# Supplementary material for: Simulated Microgravity Modulates Focal Adhesion Gene Expression in Human Neural Stem Progenitor Cells
Source: MDPI journal article supplement (doi:10.3390/life12111827), 2022-11-09
Supplement: s1 [file s1]

Table S1. Primers Sequences

| Target Genes | Forward Primer (5' to 3') | Reverse Primer (5' to 3') |
|--------------|---------------------------|---------------------------|
| MIAT         | AGTTTGAGATGGGAGGCGCT      | TGGTTACCCCTGTGATGCC       |
| ACTN1        | CATCAACAATGCCTGGGGCT      | CCTCTTTGCCGTCAGTCCAG      |
| PDGFA        | TAGAGGAGCATTTGGAGTGCG     | CATCTGGTTGGCTGCTTTAGG     |
| RBM3         | CCTATCTCTGAGGTGGTCGTT     | CTCTCCGTTTCATGGCTCTCA     |
| SMOC1        | ATGGCTCCTTTACCCAGGTG      | ACCCGTCATCTTTCCTTCCTG     |
| MYL9         | CCCACCAGAAGCCAAGATGT      | CTGTGGGGTTCTTCCCCAG       |
| ZYX          | GTGTCCCCGACTACCACAAG      | CCTCAATCGACAGGGGGCTTC     |
| ETV4         | AGTGCCTTTACTCCAGTGCCT     | GGAGGTGCCAGAGGATCTCA      |
| CNN2         | TGGCACCAGCTAGAAAACCTG     | CGAGAAGAGACACCTGCACC      |
| CDK2         | CTTTGCTGAGATGGTGACTCG     | TCATCCAGGGGAGGTACAACCT    |
| TUBB         | GGACCGCATCTCTGTGTACT      | GCCCCAGACTGACCAAATAC      |
| VIM          | GGACCAGCTAACCAACGAC       | GACGCATTGTCAACATCCTG      |
| ITGA7        | TCTGTGGAGACGCCATGTTC      | CAGGAAGTGGATCTCTGCCC      |
| KLF6         | CCACTTGAAAGCACACCAGC      | AGACCTGGAAAAACACCTGTCA    |
| KLF13        | CACACAGGTGAGAGGCCCTT      | CATTCCCGGGTGGAAGTTGG      |
| RPL27        | ACCGGGGTGAAAGAAATGGG      | GGTCAATTCCAGCCACCAGA      |
