# Supplementary material for: Simulated Microgravity Modulates Focal Adhesion Gene Expression in Human Neural Stem Progenitor Cells
Source: MDPI journal article supplement (doi:10.3390/life12111827), 2022-11-09
Supplement: s1 [file s1]

**Figure S1**

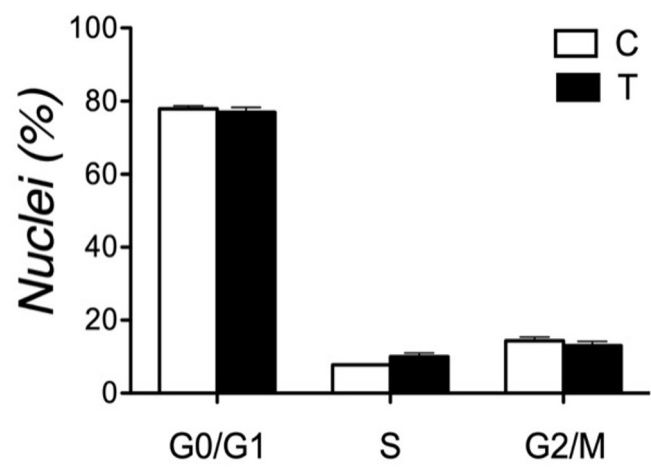

**Figure S1.** Histogram reporting the results of cytofluorimetric analysis of human NSPCs exposed to simulated microgravity (n=3).

Figure S2

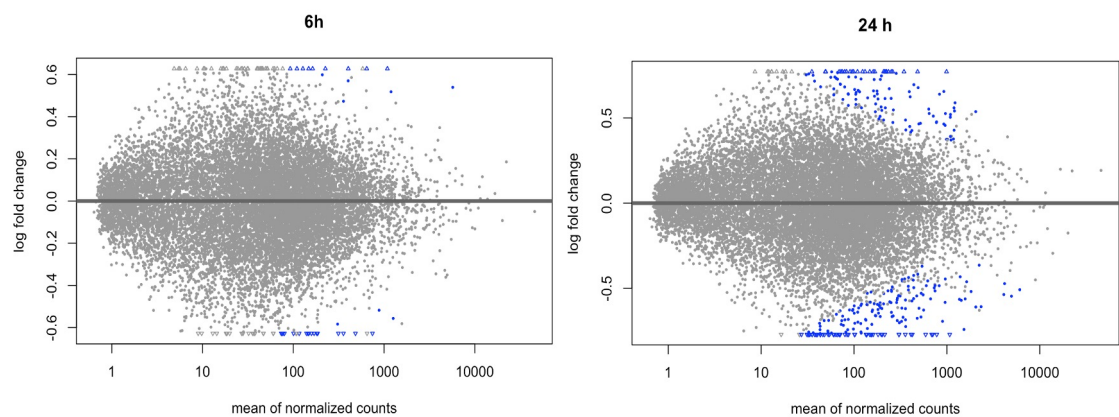

**Figure S2.** MA plot of the RNA-Seq data on hNSPCs exposed to 6 or 24 hours of simulated microgravity, respectively. Significantly DEGs (FDR < 0.1) are colored in blue.

Figure S3

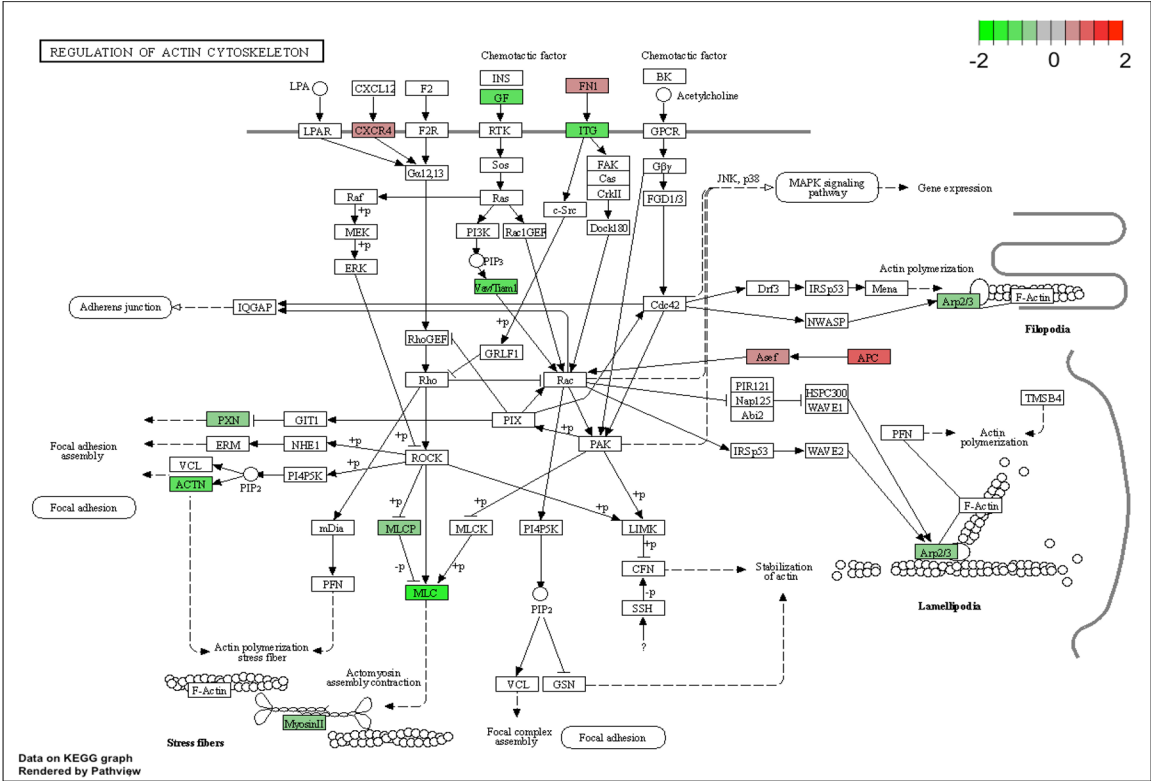

**Figure S3**, Genes significantly modulated in Regulation of Actin cytoskeleton KEGG pathway. Down-regulated genes are colored in green, up-regulated genes are in red.

Figure S4

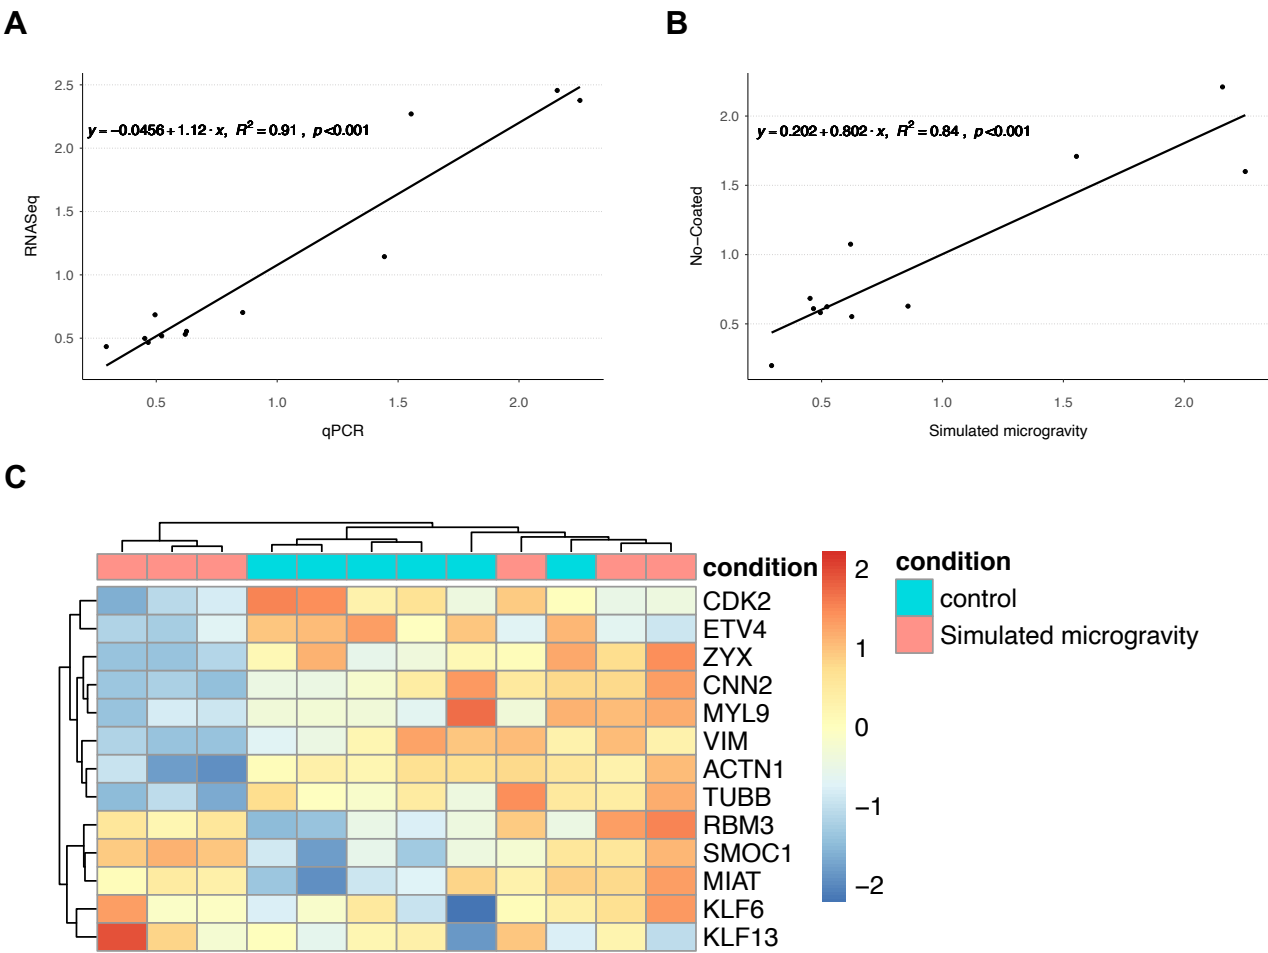

**Figure S4**, Correlation between RNA-Seq and qPCR results for the selected genes that came from the cells in the microgravity condition. **B**, Correlation of genes relative expression levels between in microgravity condition and in the no-coated (absence of laminin) condition. **C**, Heatmap showing the scaled expression levels (z-score) of RNA-Seq data of the selected genes evaluated by qPCR.

Figure S5

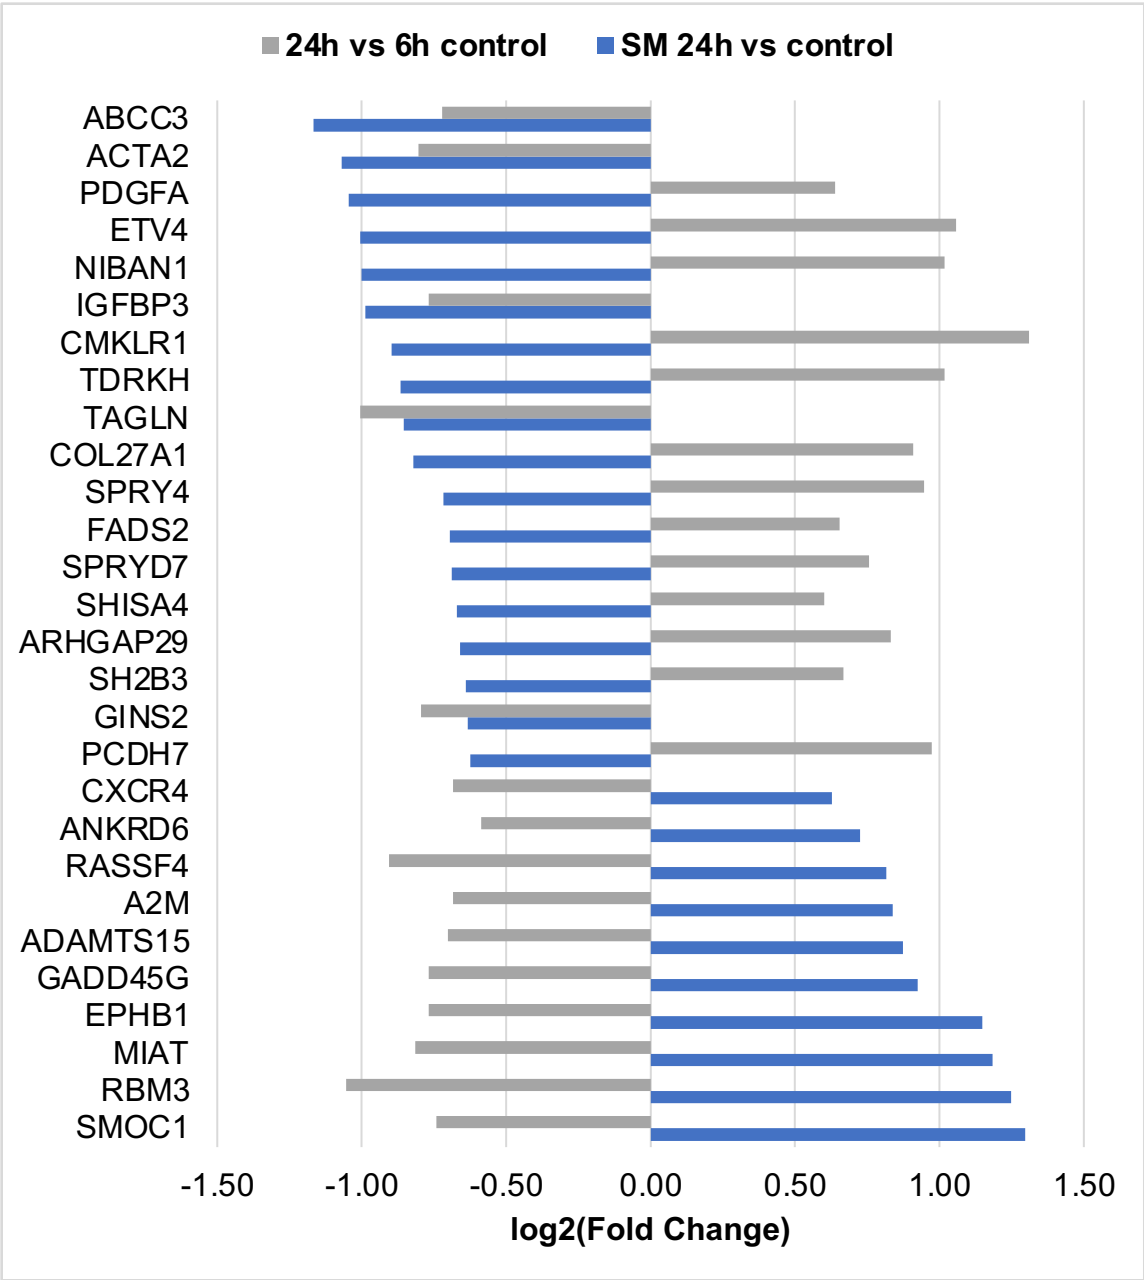

**Figure S5**, Comparison of log2(Fold Change) of significantly DEGs obtained from comparison of samples after 24h in simulated microgravity (SM) (vs sham control) and a comparison between controls kept at normal gravity in agitation for 24h samples vs 6h samples.

Figure S6

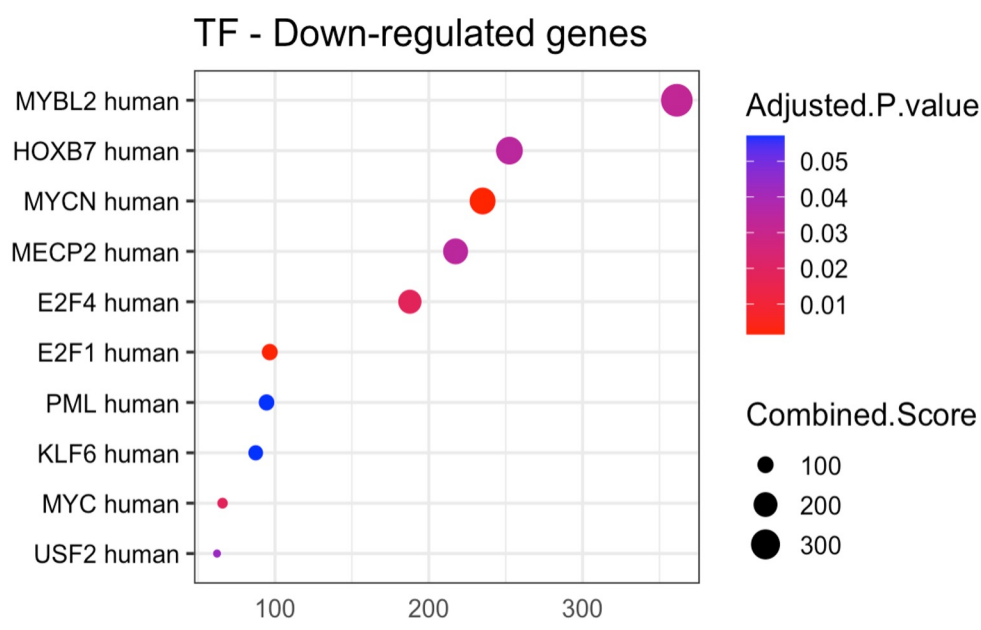

**Figure S6.** Prediction of Transcription factors potentially involved in regulation of downregulated DEGs in hNSPC exposed to 24h of simulated microgravity
