# Supplementary material for: Simulated Microgravity Modulates Focal Adhesion Gene Expression in Human Neural Stem Progenitor Cells
Source: Life (Basel). 2022 Nov 9;12(11):1827. doi: 10.3390/life12111827 (PMC9699612; doi:10.3390/life12111827)
Supplement: Supplementary file 1 [file life-12-01827-s001.zip]

Archive with 4 entries (4 files):
- Table S1.pdf
- Table S2.xlsx
- Table S3.xlsx
- Wang Di Nisio et al Supplementary figures - Revision3.pdf
