# Supplementary material for: Simulated Microgravity Modulates Focal Adhesion Gene Expression in Human Neural Stem Progenitor Cells
Source: Life (Basel). 2022 Nov 9;12(11):1827. doi: 10.3390/life12111827 (PMC9699612; doi:10.3390/life12111827)
Supplement: Supplementary file 1 [file life-12-01827-s001.zip › Table S2.xlsx]

## Sheet: 6h
EnsemblID	Symbol	Entrez	baseMean	log2FoldChange	pvalue	adjusted p (FDR)
ENSG00000164543	STK17A	9263	745.478	-0.697635	1.35967e-07	0.000817436
ENSG00000169926	KLF13	51621	163.283	0.892491	5.9723e-07	0.00179527
ENSG00000187678	SPRY4	81848	76.8912	-1.08962	9.58426e-07	0.00192069
ENSG00000143878	RHOB	388	127.517	0.865183	4.42223e-06	0.00546647
ENSG00000185650	ZFP36L1	677	1088.65	0.748584	4.5463e-06	0.00546647
ENSG00000067082	KLF6	1316	403.289	0.640232	6.90778e-06	0.00692159
ENSG00000146648	EGFR	1956	109.711	0.811183	1.99699e-05	0.0163127
ENSG00000133639	BTG1	694	644.592	0.73082	2.17069e-05	0.0163127
ENSG00000140682	TGFB1I1	7041	313.791	-0.63857	2.66517e-05	0.0178034
ENSG00000159200	RCAN1	1827	225.664	0.710789	3.1981e-05	0.0181037
ENSG00000130222	GADD45G	10912	147.662	0.809038	3.31238e-05	0.0181037
ENSG00000163064	EN1	2019	185.362	-0.721168	5.48984e-05	0.0253884
ENSG00000120694	HSPH1	10808	484.19	-0.731934	7.84523e-05	0.0336897
ENSG00000162614	NEXN	91624	147.983	-0.813636	9.07406e-05	0.0361766
ENSG00000132334	PTPRE	5791	92.5073	0.752057	9.62783e-05	0.0361766
ENSG00000166016	ABTB2	25841	116.235	-0.711436	0.000171455	0.0606346
ENSG00000124788	ATXN1	6310	208.982	0.598688	0.00024289	0.0811251
ENSG00000144677	CTDSPL	10217	79.8161	-0.814317	0.000268249	0.0848796
ENSG00000114019	AMOTL2	51421	73.748	-0.766083	0.000324254	0.0911243
ENSG00000189292	ALKAL2	285016	74.2884	-0.804019	0.000339659	0.0911243
ENSG00000064666	CNN2	1265	356.826	-0.657817	0.00035426	0.0911243
ENSG00000164975	SNAPC3	6619	100.58	-0.672369	0.000378927	0.0911243
ENSG00000145050	MANF	7873	181.708	-0.688085	0.000422665	0.0977332
ENSG00000128228	SDF2L1	23753	139.901	-0.844087	0.000480161	0.0999452
ENSG00000132002	DNAJB1	3337	307.522	-0.583632	0.000481467	0.0999452
ENSG00000113645	WWC1	23286	145.467	-0.690267	0.000488855	0.0999452
ENSG00000116161	CACYBP	27101	158.604	-0.639774	0.000545196	0.0999452
ENSG00000137962	ARHGAP29	9411	169.457	-0.707271	0.000550097	0.0999452

## Sheet: 24h
EnsemblID	Symbol	Entrez	baseMean	log2FoldChange	pvalue	adjusted p (FDR)
ENSG00000225783	MIAT	440823	990.393	1.18284	1.08607e-13	9.70187e-10
ENSG00000072110	ACTN1	87	1072.42	-1.10031	2.42206e-13	1.08181e-09
ENSG00000197461	PDGFA	5154	777.042	-1.04557	3.33835e-12	9.9405e-09
ENSG00000102317	RBM3	5935	220.996	1.2492	1.48809e-11	3.32328e-08
ENSG00000198732	SMOC1	64093	214.511	1.29624	1.57891e-10	2.82088e-07
ENSG00000101335	MYL9	10398	135.62	-1.20501	3.38617e-10	5.04144e-07
ENSG00000179218	CALR	811	1526.94	-0.741786	6.38619e-09	8.1497e-06
ENSG00000159840	ZYX	7791	424.367	-0.913017	1.60924e-08	1.79692e-05
ENSG00000115266	APC2	10297	483.801	0.803961	2.64788e-08	2.50786e-05
ENSG00000196739	COL27A1	85301	703.975	-0.821592	2.80741e-08	2.50786e-05
ENSG00000134531	EMP1	2012	201.727	-1.0445	3.46504e-08	2.81393e-05
ENSG00000107796	ACTA2	59	411.29	-1.07002	5.69491e-08	4.23939e-05
ENSG00000175832	ETV4	2118	136.852	-1.00461	1.23528e-07	7.92137e-05
ENSG00000154928	EPHB1	2047	69.1515	1.14782	1.40415e-07	7.92137e-05
ENSG00000110092	CCND1	595	686.064	-0.780416	1.41944e-07	7.92137e-05
ENSG00000175265	GOLGA8A	23015	161.075	0.881044	1.45611e-07	7.92137e-05
ENSG00000175183	CSRP2	1466	154.86	-1.06492	1.50748e-07	7.92137e-05
ENSG00000219438	TAFA5	25817	214.036	-0.858319	1.83985e-07	9.13075e-05
ENSG00000108846	ABCC3	8714	66.1216	-1.16789	2.36114e-07	0.000111011
ENSG00000140538	NTRK3	4916	208.343	0.852588	2.64329e-07	0.00011391
ENSG00000064666	CNN2	1265	356.826	-0.948174	2.67783e-07	0.00011391
ENSG00000175040	CHST2	9435	102.038	-1.15774	3.70842e-07	0.000150579
ENSG00000155980	KIF5A	3798	223.551	0.780831	5.08689e-07	0.000196477
ENSG00000166106	ADAMTS15	170689	167.594	0.873585	5.27868e-07	0.000196477
ENSG00000152661	GJA1	2697	478.994	-0.676367	6.15828e-07	0.000220048
ENSG00000215252	GOLGA8B	440270	109.059	0.918654	1.22845e-06	0.000410315
ENSG00000155660	PDIA4	9601	304.422	-0.77791	1.25337e-06	0.000410315
ENSG00000107551	RASSF4	83937	260.744	0.815183	1.28611e-06	0.000410315
ENSG00000018625	ATP1A2	477	131.417	0.878222	1.58667e-06	0.00048875
ENSG00000123374	CDK2	1017	305.251	-0.851333	1.88942e-06	0.000562606
ENSG00000145050	MANF	7873	181.708	-0.928385	2.19102e-06	0.000631367
ENSG00000061337	LZTS1	11178	101.695	-0.951734	2.69426e-06	0.00075212
ENSG00000196562	SULF2	55959	90.588	0.950124	3.25521e-06	0.000858426
ENSG00000175899	A2M	2	252.187	0.837366	3.34954e-06	0.000858426
ENSG00000130222	GADD45G	10912	147.662	0.92524	3.36336e-06	0.000858426
ENSG00000175445	LPL	4023	561.329	-0.627978	3.76173e-06	0.000933431
ENSG00000133059	DSTYK	25778	192.24	0.726106	4.51564e-06	0.00109022
ENSG00000165795	NDRG2	57447	234.917	0.880262	4.86372e-06	0.00114336
ENSG00000175782	SLC35E3	55508	74.8634	0.987783	5.10187e-06	0.00116859
ENSG00000073111	MCM2	4171	152.627	-0.908014	7.05887e-06	0.00153797
ENSG00000183049	CAMK1D	57118	324.949	-0.694417	7.42445e-06	0.00157911
ENSG00000100968	NFATC4	4776	98.6676	0.862617	8.39376e-06	0.00174375
ENSG00000149591	TAGLN	6876	590.349	-0.854774	8.90628e-06	0.00180248
ENSG00000185112	FAM43A	131583	160.694	-0.820864	9.08002e-06	0.00180248
ENSG00000111783	RFX4	5992	402.555	0.624089	1.21089e-05	0.00235149
ENSG00000184357	H1-5	3009	60.8792	-0.991041	1.70908e-05	0.00313193
ENSG00000157110	RBPMS	11030	101.394	-0.854746	1.71917e-05	0.00313193
ENSG00000139364	TMEM132B	114795	1224.53	0.588723	1.73078e-05	0.00313193
ENSG00000189171	S100A13	6284	440.885	0.69531	1.75301e-05	0.00313193
ENSG00000182742	HOXB4	3214	307.565	-0.702474	1.79352e-05	0.00314147
ENSG00000004478	FKBP4	2288	134.789	-0.800102	1.83939e-05	0.00315986
ENSG00000235162	C12orf75	387882	84.2956	-0.886587	2.11636e-05	0.00356706
ENSG00000146674	IGFBP3	3486	52.7543	-0.986564	2.269e-05	0.00375351
ENSG00000184949	FAM227A	646851	49.5831	1.01961	2.35321e-05	0.00382205
ENSG00000074410	CA12	771	95.4252	0.921631	2.40277e-05	0.00383285
ENSG00000143603	KCNN3	3782	197.381	0.746978	2.49727e-05	0.0039137
ENSG00000182175	RGMA	56963	927.072	0.655504	2.81584e-05	0.00433689
ENSG00000162614	NEXN	91624	147.983	-0.860073	3.08607e-05	0.00460932
ENSG00000100297	MCM5	4174	137.28	-0.803472	3.09593e-05	0.00460932
ENSG00000135299	ANKRD6	22881	164.596	0.725572	3.16462e-05	0.00463435
ENSG00000228474	OST4	100128731	526.242	-0.668664	3.5501e-05	0.00511501
ENSG00000204406	MBD5	55777	82.9482	0.875273	3.80429e-05	0.00530996
ENSG00000076248	UNG	7374	118.883	-0.756384	4.1684e-05	0.00564187
ENSG00000154856	APCDD1	147495	49.1707	0.971907	4.50649e-05	0.00592006
ENSG00000196923	PDLIM7	9260	500.372	-0.617319	5.17288e-05	0.00669701
ENSG00000125851	PCSK2	5126	832.359	0.639367	5.68018e-05	0.00719782
ENSG00000166598	HSP90B1	7184	2333.69	-0.608166	5.72087e-05	0.00719782
ENSG00000160932	LY6E	4061	43.5083	-0.941387	6.2576e-05	0.00776378
ENSG00000100162	CENPM	79019	63.8892	-0.878986	7.15443e-05	0.00863656
ENSG00000106628	POLD2	5425	191.745	-0.665984	7.37655e-05	0.0087383
ENSG00000113368	LMNB1	4001	327.239	-0.61649	9.25271e-05	0.0105967
ENSG00000275023	MLLT6	4302	176.703	0.658	9.45498e-05	0.0106913
ENSG00000134215	VAV3	10451	39.2308	-0.951097	0.000100545	0.0112271
ENSG00000188290	HES4	57801	79.427	0.799315	0.000103189	0.0113598
ENSG00000135842	NIBAN1	116496	32.4412	-1.00158	0.000104277	0.0113598
ENSG00000123560	PLP1	5354	123.608	0.773035	0.000122361	0.0131693
ENSG00000169851	PCDH7	5099	181.064	-0.624969	0.000129149	0.0137344
ENSG00000136274	NACAD	23148	215.575	0.613838	0.000132142	0.0137997
ENSG00000173207	CKS1B	1163	264.281	-0.662512	0.000134334	0.0137997
ENSG00000087253	LPCAT2	54947	54.4811	-0.885513	0.000134397	0.0137997
ENSG00000198937	CCDC167	154467	132.852	-0.682901	0.000141084	0.0143216
ENSG00000114374	USP9Y	8287	104.038	0.739821	0.000148304	0.01472
ENSG00000166432	ZMAT1	84460	87.6389	0.741032	0.000163998	0.0160988
ENSG00000156802	ATAD2	29028	292.067	-0.68945	0.00017476	0.0168249
ENSG00000122884	P4HA1	5033	199.603	-0.618773	0.000177045	0.0168249
ENSG00000149257	SERPINH1	871	358.346	-0.685172	0.000185887	0.0174792
ENSG00000137404	NRM	11270	118.302	-0.707148	0.000222922	0.0204582
ENSG00000131773	KHDRBS3	10656	85.5652	-0.743312	0.000226365	0.0204582
ENSG00000114115	RBP1	5947	284.648	0.761695	0.000228736	0.0204582
ENSG00000122952	ZWINT	11130	79.899	-0.812357	0.000229146	0.0204582
ENSG00000142632	ARHGEF19	128272	35.1879	0.921075	0.000231309	0.0204582
ENSG00000143476	DTL	51514	98.5514	-0.739457	0.000285315	0.0244124
ENSG00000189057	FAM111B	374393	70.5185	-0.850421	0.000291078	0.0244124
ENSG00000090857	PDPR	55066	178.238	0.640779	0.000291771	0.0244124
ENSG00000110042	DTX4	23220	239.407	0.671268	0.000295145	0.0244124
ENSG00000100345	MYH9	4627	357.886	-0.6195	0.000307582	0.0249816
ENSG00000157087	ATP2B2	491	162.003	0.658888	0.000307621	0.0249816
ENSG00000128564	VGF	7425	197.095	-0.790666	0.000317146	0.0251784
ENSG00000175063	UBE2C	11065	155.616	-0.71204	0.000318986	0.0251784
ENSG00000244879			490.545	0.677851	0.000319532	0.0251784
ENSG00000170439	METTL7B	196410	48.1075	-0.836054	0.000321318	0.0251784
ENSG00000198892	SHISA4	149345	337.323	-0.67017	0.000335296	0.0257995
ENSG00000173917	HOXB2	3212	87.0494	-0.83175	0.000337909	0.0257995
ENSG00000105127	AKAP8	10270	181.163	0.611187	0.000362145	0.0271852
ENSG00000118503	TNFAIP3	7128	35.4344	-0.895532	0.000367885	0.027386
ENSG00000157379	DHRS1	115817	66.3969	0.766183	0.000378083	0.0279125
ENSG00000134824	FADS2	9415	897.416	-0.694051	0.000385031	0.028123
ENSG00000138623	SEMA7A	8482	40.3603	-0.864438	0.00038723	0.028123
ENSG00000188486	H2AX	3014	256.478	-0.666354	0.000397135	0.0286098
ENSG00000171365	CLCN5	1184	57.4252	0.770665	0.000401624	0.0287017
ENSG00000136830	NIBAN2	64855	139.369	-0.736266	0.000406327	0.0288073
ENSG00000116580	GON4L	54856	250.921	0.614751	0.000452547	0.031587
ENSG00000255571	MIR9-3HG	254559	72.3899	0.791274	0.000491535	0.0332642
ENSG00000042445	RETSAT	54884	114.874	0.653661	0.000515873	0.0346489
ENSG00000110046	ATG2A	23130	101.598	0.667033	0.000524165	0.0348981
ENSG00000168505	GBX2	2637	70.8843	-0.859358	0.000541406	0.0353611
ENSG00000034152	MAP2K3	5606	60.046	-0.829573	0.000542341	0.0353611
ENSG00000166886	NAB2	4665	69.0978	-0.779143	0.000546271	0.0353611
ENSG00000171604	CXXC5	51523	956.944	-0.582911	0.000593007	0.0378381
ENSG00000177943	MAMDC4	158056	31.2823	-0.907706	0.000602504	0.0381714
ENSG00000168610	STAT3	6774	393.404	0.654286	0.000625883	0.0393334
ENSG00000130684	ZNF337	26152	66.3601	0.727797	0.000629651	0.0393334
ENSG00000222041	CYTOR	112597	119.435	-0.763019	0.000638095	0.039584
ENSG00000111602	TIMELESS	8914	208.09	-0.591726	0.000648285	0.0399388
ENSG00000163703	CRELD1	78987	57.2059	-0.76283	0.000670144	0.0410027
ENSG00000129195	PIMREG	54478	110.126	-0.698679	0.000679501	0.0412924
ENSG00000167797	CDK2AP2	10263	186.808	-0.601586	0.000686988	0.0413738
ENSG00000213390	ARHGAP19	84986	81.6447	-0.757262	0.000690103	0.0413738
ENSG00000183943	PRKX	5613	140.285	0.617797	0.000754062	0.0440264
ENSG00000111252	SH2B3	10019	109.682	-0.640315	0.000773717	0.0447873
ENSG00000188070	ZFTA	65998	104.337	0.638953	0.000777122	0.0447873
ENSG00000170522	ELOVL6	79071	360.067	-0.724759	0.000809891	0.0460812
ENSG00000029534	ANK1	286	37.7695	-0.803396	0.000849127	0.0476216
ENSG00000182134	TDRKH	11022	32.5886	-0.866201	0.0008502	0.0476216
ENSG00000237649	KIFC1	3833	171.331	-0.661711	0.000860874	0.0477651
ENSG00000101134	DOK5	55816	39.0373	-0.780507	0.000896599	0.0491369
ENSG00000184270	H2AC21	317772	33.4527	-0.823662	0.000927561	0.0505238
ENSG00000184436	THAP7	80764	35.4228	-0.816337	0.000935634	0.0506546
ENSG00000166794	PPIB	5479	164.793	-0.590487	0.000972536	0.0519738
ENSG00000116918	TSNAX	7257	70.9408	0.699132	0.000977455	0.0519738
ENSG00000196924	FLNA	2316	2047.59	-0.609939	0.00103695	0.0538548
ENSG00000100075	SLC25A1	6576	192.262	-0.614084	0.00106196	0.0546074
ENSG00000136114	THSD1	55901	102.055	-0.705376	0.00106366	0.0546074
ENSG00000112312	GMNN	51053	178.815	-0.59465	0.00107069	0.054654
ENSG00000187773	DIPK1C	125704	64.3804	0.732437	0.00110008	0.0548144
ENSG00000131470	PSMC3IP	29893	52.6658	-0.761342	0.00110313	0.0548144
ENSG00000171848	RRM2	6241	183.314	-0.646186	0.00110451	0.0548144
ENSG00000122870	BICC1	80114	43.207	-0.76553	0.00112141	0.0553455
ENSG00000224032			86.5866	0.641661	0.00113847	0.0558789
ENSG00000176485	PLAAT3	11145	170.941	0.582277	0.00119545	0.0574137
ENSG00000010295	IFFO1	25900	104.602	0.60903	0.00122394	0.0581565
ENSG00000121966	CXCR4	7852	166.074	0.627666	0.00123592	0.0583864
ENSG00000137962	ARHGAP29	9411	169.457	-0.660135	0.00124988	0.0584563
ENSG00000114019	AMOTL2	51421	73.748	-0.690013	0.00128099	0.0589851
ENSG00000101057	MYBL2	4605	191.08	-0.58553	0.00129488	0.0593189
ENSG00000006756	ARSD	414	71.493	0.697376	0.00134596	0.0610326
ENSG00000008513	ST3GAL1	6482	46.1784	-0.78671	0.00137848	0.0616266
ENSG00000138180	CEP55	55165	150.188	-0.581809	0.00137975	0.0616266
ENSG00000160097	FNDC5	252995	56.2123	0.738614	0.00141134	0.0623942
ENSG00000188986	NELFB	25920	137.312	-0.595656	0.00147066	0.0637738
ENSG00000157514	TSC22D3	1831	62.1726	0.740176	0.00147927	0.0638371
ENSG00000111196	MAGOHB	55110	52.2892	-0.751046	0.00152005	0.0652818
ENSG00000089159	PXN	5829	134.357	-0.687258	0.00156521	0.0668997
ENSG00000076003	MCM6	4175	100.506	-0.646348	0.00165234	0.0699545
ENSG00000105612	DNASE2	1777	79.2867	0.681963	0.00168148	0.070852
ENSG00000187678	SPRY4	81848	76.8912	-0.717725	0.00169552	0.0711085
ENSG00000165304	MELK	9833	43.0867	-0.743145	0.00173601	0.0722775
ENSG00000097021	ACOT7	11332	75.4254	-0.663663	0.00173958	0.0722775
ENSG00000183688	RFLNB	359845	100.384	-0.60333	0.00176565	0.0726844
ENSG00000147119	CHST7	56548	43.3358	-0.776585	0.00182827	0.0745752
ENSG00000115884	SDC1	6382	36.3867	-0.761919	0.00190132	0.0766869
ENSG00000144677	CTDSPL	10217	79.8161	-0.685293	0.00197639	0.0773278
ENSG00000143772	ITPKB	3707	120.505	-0.592488	0.0019766	0.0773278
ENSG00000197921	HES5	388585	345.213	0.825128	0.00199243	0.0773278
ENSG00000132819	RBM38	55544	72.7994	-0.711988	0.00199257	0.0773278
ENSG00000184005	ST6GALNAC3	256435	31.2214	-0.780343	0.00200956	0.0773278
ENSG00000065328	MCM10	55388	158.344	-0.627445	0.00201238	0.0773278
ENSG00000231764			119.054	0.728773	0.00201694	0.0773278
ENSG00000118785	SPP1	6696	250.228	-0.584274	0.00211192	0.0785593
ENSG00000139636	LMBR1L	55716	105.252	0.649352	0.00212735	0.0785593
ENSG00000133302	SLF1	84250	89.451	-0.627376	0.00212821	0.0785593
ENSG00000180822	PSMG4	389362	110.819	0.661554	0.00214443	0.078832
ENSG00000135046	ANXA1	301	86.7891	-0.68284	0.00215452	0.0788785
ENSG00000092853	CLSPN	63967	252.86	-0.641507	0.00222565	0.08115
ENSG00000158164	TMSB15A	11013	97.2468	-0.624616	0.00227346	0.0820784
ENSG00000115414	FN1	2335	86.8453	0.63867	0.00227868	0.0820784
ENSG00000123178	SPRYD7	57213	53.2883	-0.688585	0.00244078	0.0865219
ENSG00000165886	UBTD1	80019	112.122	-0.615756	0.00248328	0.0876803
ENSG00000145721	LIX1	167410	36.263	0.750607	0.00254965	0.0887992
ENSG00000152953	STK32B	55351	43.2081	-0.722808	0.00259681	0.0892203
ENSG00000197928	ZNF677	342926	75.9167	0.608445	0.00266573	0.0905437
ENSG00000126775	ATG14	22863	60.6027	0.670671	0.00271582	0.0908628
ENSG00000174600	CMKLR1	1240	27.1536	-0.895769	0.00274446	0.0911387
ENSG00000148481	MINDY3	80013	42.5469	-0.70576	0.00279811	0.0921051
ENSG00000167065	DUSP18	150290	37.5829	0.71609	0.00282355	0.0921051
ENSG00000241839	PLEKHO2	80301	32.5319	0.758469	0.0028677	0.092148
ENSG00000121064	SCPEP1	59342	30.5946	0.753052	0.00288654	0.092421
ENSG00000160213	CSTB	1476	156.551	-0.636518	0.00291719	0.0930384
ENSG00000136982	DSCC1	79075	32.5419	-0.756724	0.0029861	0.0945915
ENSG00000141682	PMAIP1	5366	64.5973	-0.652919	0.00304021	0.0957377
ENSG00000140848	CPNE2	221184	286.909	-0.583673	0.00304371	0.0957377
ENSG00000135362	PRR5L	79899	60.5346	0.635179	0.0030974	0.0970845
ENSG00000273270			43.6823	0.682633	0.00313666	0.0979713
ENSG00000198855	FICD	11153	47.7299	-0.689564	0.00319154	0.0989931
ENSG00000170689	HOXB9	3219	96.4736	-0.630344	0.00322813	0.0992942
ENSG00000131153	GINS2	51659	70.8491	-0.632595	0.00323687	0.0992942
ENSG00000119333	DYNC2I2	89891	118.564	-0.600965	0.00324571	0.0992942
