# Supplementary material for: Simulated Microgravity Modulates Focal Adhesion Gene Expression in Human Neural Stem Progenitor Cells
Source: Life (Basel). 2022 Nov 9;12(11):1827. doi: 10.3390/life12111827 (PMC9699612; doi:10.3390/life12111827)
Supplement: Supplementary file 1 [file life-12-01827-s001.zip › Table S3.xlsx]

## Sheet: raw counts
	control_24h_1	control_24h_2	control_24h_3	control_6h_1	control_6h_2	control_6h_3	microgravity_24h_1	microgravity_24h_2	microgravity_24h_3	microgravity_6h_1	microgravity_6h_2	microgravity_6h_3
ENSG00000000003	163	129	123	122	148	121	104	130	163	118	207	138
ENSG00000000419	46	38	48	50	58	43	23	32	40	45	67	56
ENSG00000000457	25	13	12	19	6	12	18	22	20	9	10	12
ENSG00000000460	16	34	20	50	26	23	14	30	33	29	31	17
ENSG00000001036	48	30	38	51	47	29	29	27	19	47	56	45
ENSG00000001084	13	9	4	22	8	10	18	11	20	15	16	19
ENSG00000001167	32	22	29	18	36	23	17	21	18	15	28	29
ENSG00000001460	2	2	0	1	1	1	0	2	0	1	6	1
ENSG00000001461	39	33	30	40	38	34	21	73	67	24	49	36
ENSG00000001497	99	81	59	102	92	67	72	63	66	70	112	102
ENSG00000001629	304	165	147	201	183	200	109	180	245	77	197	209
ENSG00000001630	40	3	12	27	6	7	11	8	20	7	19	13
ENSG00000001631	208	121	65	206	134	129	125	144	189	104	144	179
ENSG00000002016	47	18	23	47	42	39	13	24	43	12	35	21
ENSG00000002330	93	55	87	92	91	48	52	45	65	40	71	87
ENSG00000002549	174	113	73	127	83	73	78	120	113	62	84	141
ENSG00000002586	920	779	1013	739	1435	1074	578	642	691	719	1626	1119
ENSG00000002587	115	68	90	65	98	99	40	56	98	23	75	66
ENSG00000002746	16	9	3	9	2	8	9	17	9	10	6	10
ENSG00000002822	45	30	26	41	30	23	16	38	35	36	30	35
ENSG00000002834	361	441	459	461	314	280	284	240	286	295	400	312
ENSG00000002919	62	37	37	50	46	48	29	50	52	30	59	74
ENSG00000003056	122	82	87	135	120	96	49	88	83	85	114	118
ENSG00000003096	38	40	24	48	62	36	35	33	37	46	72	35
ENSG00000003147	46	21	16	23	18	23	23	51	37	7	38	17
ENSG00000003249	51	49	36	78	43	34	27	55	71	57	67	52
ENSG00000003393	135	74	51	115	70	70	56	57	78	47	74	80
ENSG00000003402	233	161	123	333	122	162	154	242	250	224	215	208
ENSG00000003436	27	41	22	15	35	30	9	27	37	19	41	31
ENSG00000003509	38	20	13	32	25	26	15	28	20	14	26	27
ENSG00000003756	551	370	354	324	380	376	310	459	463	293	421	389
ENSG00000003989	0	2	2	0	0	0	0	3	1	1	5	2
ENSG00000004059	2	3	6	0	19	3	10	4	3	4	4	1
ENSG00000004139	147	128	53	148	109	118	68	119	148	91	150	133
ENSG00000004142	114	96	88	149	106	100	82	119	101	81	174	149
ENSG00000004399	13	9	2	11	11	13	7	8	5	7	10	18
ENSG00000004455	131	96	94	211	136	96	64	85	97	90	136	107
ENSG00000004468	0	1	0	0	3	2	1	0	1	0	1	1
ENSG00000004478	209	181	179	227	122	171	66	104	90	74	133	123
ENSG00000004487	167	109	102	136	161	190	76	140	113	128	199	178
ENSG00000004534	623	423	374	589	408	452	362	486	541	385	451	465
ENSG00000004660	6	9	0	3	2	0	1	3	3	3	3	0
ENSG00000004700	98	86	61	116	75	98	49	91	90	82	115	97
ENSG00000004766	46	28	41	45	47	42	18	25	44	28	55	23
ENSG00000004776	1	2	0	2	0	1	0	0	3	3	1	1
ENSG00000004777	161	107	55	167	61	83	69	103	133	66	113	119
ENSG00000004779	273	199	217	334	293	201	150	171	169	238	313	237
ENSG00000004799	3	4	1	4	6	2	0	1	4	1	8	1
ENSG00000004838	3	2	2	10	2	4	5	4	4	5	8	6
ENSG00000004848	6	7	4	6	16	2	1	0	5	1	11	6
ENSG00000004864	105	118	83	148	145	94	52	117	81	73	137	127
ENSG00000004866	19	15	15	27	9	10	10	10	15	16	34	25
ENSG00000004897	286	206	147	367	179	169	151	166	263	173	275	230
ENSG00000004961	42	38	39	55	52	46	28	35	25	51	78	53
ENSG00000004975	231	187	113	227	138	134	102	135	158	119	144	110
ENSG00000005007	300	270	219	328	259	294	173	305	265	178	313	329
ENSG00000005020	43	24	21	32	23	15	25	32	32	20	14	9
ENSG00000005022	150	135	167	223	285	178	91	82	116	190	263	219
ENSG00000005059	218	171	144	298	238	213	93	175	158	188	299	245
ENSG00000005075	396	321	277	383	282	313	163	263	264	159	406	313
ENSG00000005100	145	105	94	198	167	149	87	142	126	111	198	190
ENSG00000005108	60	67	91	44	49	45	24	50	73	21	44	33
ENSG00000005156	258	176	155	210	161	142	76	168	195	105	219	177
ENSG00000005175	328	210	167	366	173	173	174	209	225	180	285	240
ENSG00000005189	20	16	16	35	21	15	12	20	23	9	39	28
ENSG00000005194	97	92	79	111	80	107	56	86	109	69	126	105
ENSG00000005206	382	262	161	302	175	200	240	357	361	145	265	318
ENSG00000005238	23	27	19	23	39	24	24	14	18	39	34	28
ENSG00000005249	209	164	123	222	167	141	64	129	148	104	199	251
ENSG00000005302	201	98	98	323	108	121	82	125	154	104	162	161
ENSG00000005339	559	309	250	517	260	365	251	468	495	320	420	413
ENSG00000005379	10	11	12	4	12	14	11	15	24	3	17	13
ENSG00000005436	20	9	7	26	3	14	7	16	19	19	11	9
ENSG00000005448	125	90	62	201	66	100	63	145	108	66	129	102
ENSG00000005469	31	31	34	23	23	31	12	27	32	26	47	35
ENSG00000005471	2	1	1	3	8	5	0	7	9	3	6	9
ENSG00000005483	1444	941	767	1580	683	852	803	1143	1417	893	1225	1046
ENSG00000005486	165	173	119	204	258	200	155	203	167	154	329	268
ENSG00000005513	254	295	222	265	334	275	130	225	287	144	405	366
ENSG00000005700	253	175	167	302	168	199	132	165	249	159	269	198
ENSG00000005801	165	156	117	125	143	116	84	127	139	81	194	192
ENSG00000005810	307	281	222	276	179	314	164	265	373	219	332	335
ENSG00000005812	42	21	24	29	32	26	23	23	43	55	31	33
ENSG00000005882	27	23	31	50	32	30	22	33	27	26	53	32
ENSG00000005884	181	52	29	295	87	71	39	76	52	174	84	73
ENSG00000005889	115	70	90	131	65	89	42	102	78	84	120	118
ENSG00000005893	171	191	163	217	323	206	95	153	210	206	362	323
ENSG00000005961	0	0	0	1	2	5	2	0	2	0	2	1
ENSG00000006007	252	159	127	319	203	164	172	172	211	175	275	255
ENSG00000006015	193	119	120	206	115	117	88	123	125	67	151	162
ENSG00000006016	8	6	4	17	14	8	10	6	9	5	4	6
ENSG00000006025	22	20	31	25	32	20	22	33	28	19	17	26
ENSG00000006042	130	125	119	251	214	152	63	92	98	146	277	217
ENSG00000006062	28	37	17	35	7	13	4	15	26	16	26	20
ENSG00000006071	0	6	3	3	6	1	2	5	8	4	11	13
ENSG00000006118	479	446	427	600	502	511	192	355	365	328	498	625
ENSG00000006125	1649	1386	943	1993	1202	1157	888	1463	1674	806	1804	1549
ENSG00000006194	36	32	33	48	57	33	39	41	50	44	65	51
ENSG00000006210	101	123	174	85	179	127	54	83	70	90	183	166
ENSG00000006282	42	14	14	28	45	17	15	19	19	22	30	25
ENSG00000006283	2	0	2	2	8	5	2	2	3	0	1	2
ENSG00000006327	105	109	123	234	103	35	69	29	41	127	108	92
ENSG00000006377	5	13	6	9	20	9	2	20	15	7	15	21
ENSG00000006432	1	3	2	7	3	3	5	5	1	2	4	6
ENSG00000006451	395	251	238	420	264	269	167	248	308	204	326	310
ENSG00000006453	1	0	0	0	0	0	3	2	0	1	2	1
ENSG00000006459	16	28	10	20	21	5	13	18	35	14	20	22
ENSG00000006468	1024	889	842	649	1101	981	713	1077	1448	846	1392	1144
ENSG00000006530	17	10	23	22	23	12	12	14	19	23	28	16
ENSG00000006534	47	25	18	72	31	34	18	17	16	31	50	43
ENSG00000006576	60	62	40	102	36	49	28	54	47	65	61	51
ENSG00000006607	55	40	34	57	36	23	34	32	44	51	45	32
ENSG00000006625	129	140	142	346	163	135	67	77	101	175	230	167
ENSG00000006634	256	176	154	259	150	184	64	138	152	137	252	249
ENSG00000006638	1	1	4	9	1	0	4	3	2	3	3	2
ENSG00000006652	46	60	47	71	71	45	25	48	40	63	52	60
ENSG00000006695	38	26	13	42	25	23	18	20	18	22	38	31
ENSG00000006704	36	26	30	44	48	47	42	41	32	40	81	68
ENSG00000006712	276	160	175	322	170	184	128	214	191	164	231	237
ENSG00000006715	253	173	98	170	180	149	127	195	232	113	230	184
ENSG00000006740	3	0	1	3	0	3	0	1	1	6	0	1
ENSG00000006744	99	48	53	113	41	62	52	60	73	74	100	77
ENSG00000006756	94	53	38	84	55	58	113	79	80	59	86	50
ENSG00000006831	306	184	164	364	231	247	114	215	232	223	265	280
ENSG00000006837	13	23	20	15	11	17	6	22	11	15	10	12
ENSG00000007047	146	149	124	167	125	151	63	160	220	99	187	194
ENSG00000007062	252	284	275	278	299	296	122	222	269	160	354	325
ENSG00000007080	141	81	49	100	63	93	32	86	70	42	95	124
ENSG00000007168	410	275	265	430	298	256	293	285	386	303	342	333
ENSG00000007174	15	5	9	3	4	6	4	9	7	0	8	7
ENSG00000007202	168	147	102	168	96	136	85	146	143	114	191	181
ENSG00000007237	333	130	99	266	136	151	143	192	212	198	318	212
ENSG00000007255	314	130	68	169	108	87	85	190	150	74	143	119
ENSG00000007341	36	22	31	39	33	26	33	45	42	13	32	30
ENSG00000007372	125	81	82	211	156	146	62	124	98	116	198	164
ENSG00000007376	57	49	48	69	61	50	21	37	42	44	41	60
ENSG00000007384	99	39	61	103	49	45	43	71	85	44	71	86
ENSG00000007392	498	305	240	555	331	393	213	388	469	317	554	406
ENSG00000007516	32	18	19	15	18	16	15	26	33	20	51	32
ENSG00000007520	324	299	194	414	307	261	163	219	217	227	377	320
ENSG00000007541	58	36	43	46	40	45	25	63	85	37	56	55
ENSG00000007545	98	78	62	86	57	58	46	76	75	45	105	119
ENSG00000007866	39	25	30	30	63	43	13	21	39	19	30	30
ENSG00000007923	158	115	95	153	104	122	74	125	142	92	160	135
ENSG00000007944	7	10	3	5	9	10	7	11	23	0	9	21
ENSG00000007968	36	48	28	94	49	56	18	36	30	90	76	72
ENSG00000008018	627	420	342	857	537	437	466	456	461	595	883	631
ENSG00000008056	13	14	23	7	15	13	11	27	36	13	18	13
ENSG00000008083	756	499	323	613	429	493	398	475	534	355	604	536
ENSG00000008086	126	63	50	225	104	80	62	124	104	142	100	130
ENSG00000008128	66	44	42	77	35	35	38	33	50	27	44	33
ENSG00000008130	49	28	24	33	28	25	25	23	37	11	21	24
ENSG00000008196	21	59	42	7	49	53	10	42	62	12	71	59
ENSG00000008226	2	2	0	1	0	0	0	0	5	0	0	0
ENSG00000008256	109	56	62	105	52	59	52	68	86	49	82	75
ENSG00000008277	105	67	34	59	55	61	53	84	91	36	77	57
ENSG00000008282	81	50	60	87	113	73	63	58	68	77	87	83
ENSG00000008283	40	19	16	62	20	17	32	32	32	24	20	38
ENSG00000008294	1338	802	635	1369	744	850	540	849	1087	673	1026	1051
ENSG00000008300	74	34	37	52	51	34	37	53	70	41	45	53
ENSG00000008311	105	70	34	76	54	91	51	98	123	52	59	88
ENSG00000008324	82	68	47	83	81	62	32	38	59	37	76	51
ENSG00000008382	88	49	44	90	34	52	22	38	49	23	62	54
ENSG00000008394	13	2	1	5	2	6	1	3	2	5	3	0
ENSG00000008405	49	32	40	46	37	43	18	32	15	37	60	56
ENSG00000008441	1076	659	578	1209	827	932	547	879	936	579	1060	1124
ENSG00000008513	115	50	58	87	54	40	19	34	34	15	36	50
ENSG00000008517	9	0	1	8	2	0	0	1	1	6	0	2
ENSG00000008710	307	150	135	236	111	129	132	166	227	145	201	176
ENSG00000008735	46	29	28	28	18	12	12	24	26	9	8	15
ENSG00000008838	790	589	325	1248	408	399	295	694	717	401	723	532
ENSG00000008853	202	118	100	167	77	155	67	101	123	82	123	141
ENSG00000008869	30	8	19	42	23	27	15	21	26	19	19	22
ENSG00000008952	875	617	866	891	672	668	563	584	686	707	864	795
ENSG00000008988	2680	1946	1683	3236	2763	2053	1619	1902	2253	2119	3087	2383
ENSG00000009307	2722	2044	1549	2973	2020	1808	1542	1940	1980	1881	2937	2443
ENSG00000009335	167	145	89	180	115	90	73	140	154	123	180	177
ENSG00000009413	664	469	480	745	375	536	384	689	801	463	685	684
ENSG00000009694	566	479	399	339	402	461	387	652	813	286	706	614
ENSG00000009780	69	60	28	67	24	33	51	42	62	42	41	47
ENSG00000009830	414	251	154	406	227	236	170	187	188	212	218	266
ENSG00000009844	156	119	113	137	135	108	68	121	110	111	183	168
ENSG00000009950	13	6	0	0	0	0	1	3	2	1	3	0
ENSG00000009954	1269	763	750	1663	586	804	526	810	941	785	945	980
ENSG00000010017	60	48	43	39	58	40	38	37	49	62	71	57
ENSG00000010072	43	63	37	54	38	43	27	31	31	48	53	38
ENSG00000010165	67	41	39	91	38	51	37	40	54	40	63	65
ENSG00000010219	63	52	50	33	68	48	18	36	45	51	55	58
ENSG00000010244	590	399	321	598	453	415	294	447	507	410	523	454
ENSG00000010256	274	206	196	418	257	222	139	215	214	227	268	272
ENSG00000010270	69	64	82	71	123	78	43	37	55	91	107	82
ENSG00000010278	35	48	55	35	150	37	54	26	44	92	114	71
ENSG00000010292	180	135	92	210	124	111	84	108	123	112	106	97
ENSG00000010295	116	92	74	144	81	86	118	118	157	93	105	77
ENSG00000010310	1	0	1	0	1	0	1	3	1	2	0	1
ENSG00000010318	16	13	9	10	9	6	9	2	12	14	13	8
ENSG00000010322	222	153	158	179	162	170	116	149	148	121	197	149
ENSG00000010361	54	25	23	59	41	28	9	20	37	33	36	34
ENSG00000010404	774	594	515	670	748	572	387	451	523	541	941	774
ENSG00000010539	22	19	20	39	31	36	6	27	26	16	34	23
ENSG00000010626	83	69	22	89	46	35	30	42	31	27	45	56
ENSG00000010704	0	3	3	3	3	0	1	4	0	0	0	0
ENSG00000010803	54	50	36	72	55	39	39	20	24	43	63	51
ENSG00000010810	1396	914	701	823	656	705	795	967	1094	769	1012	834
ENSG00000010818	13	22	18	41	26	7	18	16	19	46	37	25
ENSG00000011007	117	122	124	139	156	110	96	90	119	99	166	148
ENSG00000011009	180	164	108	262	172	154	84	163	185	100	191	227
ENSG00000011021	150	60	54	75	69	51	44	38	63	76	133	81
ENSG00000011028	903	621	729	724	799	761	651	705	648	573	1196	967
ENSG00000011105	221	74	78	308	92	93	77	71	91	108	108	112
ENSG00000011114	350	286	178	413	254	239	209	317	352	261	362	278
ENSG00000011132	4	18	31	34	19	21	14	19	18	4	20	17
ENSG00000011143	63	42	48	54	74	62	39	44	47	38	57	58
ENSG00000011198	7	6	6	8	6	5	4	6	1	5	5	6
ENSG00000011243	214	119	120	111	104	144	115	200	163	91	215	202
ENSG00000011258	37	31	27	32	26	31	16	34	35	21	52	42
ENSG00000011260	188	140	126	137	115	138	91	123	130	79	105	129
ENSG00000011275	436	258	206	368	235	227	178	303	283	192	293	316
ENSG00000011295	288	212	116	379	204	180	170	230	260	179	245	262
ENSG00000011304	868	591	468	991	632	553	422	543	489	662	745	770
ENSG00000011332	191	199	120	313	238	243	77	156	131	153	235	276
ENSG00000011376	78	52	57	69	52	57	35	36	56	25	65	38
ENSG00000011405	922	603	429	839	380	544	407	705	730	401	626	633
ENSG00000011422	26	16	25	38	35	25	13	16	9	45	22	22
ENSG00000011426	178	129	111	248	82	124	59	89	100	140	133	143
ENSG00000011451	149	172	164	164	161	173	100	138	159	143	214	165
ENSG00000011454	671	449	443	689	453	503	336	549	644	422	581	560
ENSG00000011478	5	0	1	3	2	1	3	1	2	6	2	1
ENSG00000011485	147	105	59	133	67	91	54	91	104	76	128	116
ENSG00000011523	230	152	107	190	117	156	125	180	236	115	228	271
ENSG00000011566	68	58	32	84	48	62	26	61	67	40	74	66
ENSG00000011638	12	32	21	24	25	32	18	16	17	16	29	17
ENSG00000012048	146	101	55	348	86	111	53	84	85	120	108	109
ENSG00000012061	150	84	119	170	111	112	71	92	104	81	166	168
ENSG00000012171	12	5	1	6	7	1	4	9	1	13	2	2
ENSG00000012174	58	50	38	52	57	33	25	50	52	40	55	59
ENSG00000012232	498	436	329	533	459	404	240	383	450	284	555	487
ENSG00000012660	357	129	111	218	123	76	119	104	141	127	165	161
ENSG00000012817	54	47	40	49	69	58	38	74	58	33	53	57
ENSG00000012822	58	39	20	51	31	42	18	56	80	26	64	53
ENSG00000012963	88	81	74	122	143	93	32	59	72	113	121	88
ENSG00000012983	232	171	102	219	176	155	88	146	211	80	189	165
ENSG00000013016	30	19	19	28	25	28	11	19	10	9	20	20
ENSG00000013275	407	294	264	439	317	325	124	250	243	257	362	323
ENSG00000013288	40	32	45	86	49	81	29	43	46	30	69	69
ENSG00000013306	285	260	186	292	239	247	125	183	207	146	289	261
ENSG00000013364	18	7	11	15	11	14	9	4	18	10	11	8
ENSG00000013374	213	154	147	276	189	166	135	161	199	162	233	228
ENSG00000013375	247	126	142	238	156	125	86	116	126	99	158	160
ENSG00000013392	8	8	7	15	20	7	6	16	8	18	9	15
ENSG00000013441	147	118	83	89	149	131	88	175	205	109	224	230
ENSG00000013503	71	53	60	59	34	32	26	47	64	43	40	63
ENSG00000013523	13	11	8	2	16	9	13	9	3	15	11	7
ENSG00000013561	100	58	69	88	69	63	30	44	62	63	86	48
ENSG00000013563	5	0	3	4	3	4	8	5	7	5	3	3
ENSG00000013573	86	48	30	135	60	48	27	39	49	54	80	77
ENSG00000013583	23	18	14	28	15	14	12	11	10	10	28	17
ENSG00000013619	30	19	16	47	28	27	15	22	21	61	42	33
ENSG00000013810	338	300	225	500	280	302	152	153	209	341	336	319
ENSG00000014123	108	77	56	126	73	69	46	84	96	66	91	83
ENSG00000014138	42	39	38	73	47	26	19	26	16	46	51	21
ENSG00000014164	22	9	6	17	8	21	5	23	8	19	17	22
ENSG00000014216	65	68	70	87	65	49	59	53	69	82	114	71
ENSG00000014641	296	199	157	244	168	165	119	128	137	106	172	179
ENSG00000014824	186	147	133	258	113	134	105	137	209	122	170	180
ENSG00000014914	36	37	38	35	45	24	23	23	19	27	31	23
ENSG00000014919	90	60	86	88	93	68	45	66	71	56	74	73
ENSG00000015133	130	116	48	160	84	138	75	136	145	112	187	183
ENSG00000015153	164	94	95	154	90	108	81	90	130	113	148	150
ENSG00000015171	576	415	354	509	374	357	297	432	411	345	520	470
ENSG00000015285	6	11	1	5	1	8	9	11	5	3	14	15
ENSG00000015475	78	54	58	109	86	50	29	47	45	57	102	95
ENSG00000015479	2	4	1	1	0	3	5	2	10	1	0	5
ENSG00000015532	40	45	34	55	41	31	25	40	41	19	46	35
ENSG00000015592	185	185	155	91	56	94	149	252	318	34	144	153
ENSG00000015676	309	242	228	321	230	222	128	268	239	137	305	246
ENSG00000016391	7	15	12	5	12	9	4	25	19	5	24	19
ENSG00000016864	76	63	61	79	93	67	39	42	63	38	99	75
ENSG00000017260	100	119	102	102	88	92	90	56	83	76	108	100
ENSG00000017797	208	147	120	251	155	127	86	77	141	113	137	135
ENSG00000018189	1090	930	954	677	824	858	541	1012	1201	558	1059	1069
ENSG00000018236	1	3	2	4	1	2	0	0	2	4	5	1
ENSG00000018408	570	368	322	519	319	262	250	250	242	293	342	360
ENSG00000018510	66	43	60	87	52	44	30	38	54	34	96	54
ENSG00000018610	44	20	31	35	24	46	28	28	27	29	45	36
ENSG00000018625	111	114	119	80	96	116	140	228	249	72	126	108
ENSG00000018699	20	13	7	16	12	22	12	13	14	11	6	8
ENSG00000018869	25	4	15	15	5	12	9	12	18	7	15	14
ENSG00000019144	520	377	310	608	341	317	247	360	424	225	362	297
ENSG00000019485	10	15	11	18	17	11	10	9	20	25	17	12
ENSG00000019549	0	0	0	6	6	7	1	0	0	0	6	5
ENSG00000019582	22	22	15	53	34	27	9	27	13	41	38	30
ENSG00000019995	270	153	125	251	129	130	105	195	240	179	216	217
ENSG00000020129	201	120	88	339	97	99	52	177	199	101	169	148
ENSG00000020256	29	28	30	24	24	25	30	27	18	29	28	25
ENSG00000020426	92	49	51	84	77	57	34	63	80	48	98	69
ENSG00000020577	55	42	45	59	7	24	26	41	42	35	24	36
ENSG00000020922	168	119	61	288	135	162	60	93	100	111	152	171
ENSG00000021300	205	165	149	184	213	170	90	179	187	89	213	233
ENSG00000021574	92	78	93	86	70	64	43	80	93	67	70	88
ENSG00000021645	8	10	3	10	18	12	7	9	12	11	16	7
ENSG00000021762	116	99	64	131	75	53	59	107	80	66	132	88
ENSG00000021776	235	184	166	190	154	167	116	188	212	130	180	245
ENSG00000021826	5	4	8	6	7	10	2	1	14	2	4	8
ENSG00000022267	49	44	71	45	90	58	23	41	47	42	127	79
ENSG00000022277	437	317	228	408	268	305	182	309	330	234	314	310
ENSG00000022355	2	1	2	2	0	1	6	0	1	1	1	1
ENSG00000022556	32	19	10	45	12	17	29	25	19	19	34	30
ENSG00000022567	31	11	25	26	11	21	20	22	20	25	29	15
ENSG00000022840	319	281	235	345	303	205	200	245	296	292	366	278
ENSG00000022976	106	55	36	86	68	66	43	93	87	50	81	71
ENSG00000023041	60	70	39	103	63	54	46	52	62	57	68	40
ENSG00000023171	19	7	2	6	9	6	5	10	20	11	20	10
ENSG00000023191	168	129	148	188	153	141	86	104	116	157	183	157
ENSG00000023228	427	289	260	336	252	274	194	308	341	223	382	355
ENSG00000023287	415	231	232	330	215	291	183	270	355	225	289	306
ENSG00000023318	141	79	87	140	98	105	80	93	91	73	167	95
ENSG00000023330	48	33	47	62	50	26	14	25	33	39	79	48
ENSG00000023445	1	3	4	12	1	0	2	1	2	12	0	4
ENSG00000023516	324	221	226	273	199	211	136	217	264	179	260	275
ENSG00000023572	24	22	13	33	23	27	16	29	21	24	23	19
ENSG00000023608	85	80	52	90	53	38	42	66	67	43	50	53
ENSG00000023697	28	13	23	25	40	30	10	12	20	30	43	21
ENSG00000023734	335	287	262	329	311	233	160	216	257	237	389	318
ENSG00000023902	700	510	394	715	506	602	408	517	537	341	643	624
ENSG00000023909	78	24	16	89	55	38	24	62	39	31	45	54
ENSG00000024048	162	112	92	146	93	126	68	121	146	108	137	141
ENSG00000024422	121	113	83	158	100	110	53	90	120	77	106	87
ENSG00000024526	70	76	33	109	38	52	20	40	38	41	49	34
ENSG00000024862	55	51	44	59	46	62	25	36	44	53	82	68
ENSG00000025039	200	192	147	368	236	185	108	206	242	144	269	238
ENSG00000025156	151	200	109	221	154	157	123	145	159	144	248	200
ENSG00000025293	228	162	124	265	128	119	122	139	206	147	196	194
ENSG00000025434	8	21	12	15	8	17	15	21	18	10	19	24
ENSG00000025708	5	1	1	5	2	4	2	3	5	6	6	5
ENSG00000025770	122	73	84	138	83	94	54	77	50	89	94	100
ENSG00000025772	99	111	102	136	161	104	50	66	70	57	136	121
ENSG00000025796	474	290	279	676	272	250	312	330	389	345	391	342
ENSG00000025800	660	450	354	816	383	404	283	500	545	326	541	508
ENSG00000026025	9214	4998	4861	8695	8121	5772	2872	3745	4329	7094	8732	7862
ENSG00000026103	13	12	19	17	20	17	3	8	18	18	23	20
ENSG00000026297	46	29	11	59	27	30	11	26	32	12	41	30
ENSG00000026508	224	88	85	484	182	101	102	79	86	381	184	206
ENSG00000026559	7	3	1	9	2	2	4	1	2	1	13	7
ENSG00000026652	328	187	160	266	142	170	195	231	286	176	248	203
ENSG00000026950	27	35	17	26	25	16	7	15	26	14	30	15
ENSG00000027001	10	29	15	20	29	15	18	12	10	18	21	23
ENSG00000027075	0	6	0	0	1	3	1	2	2	0	2	3
ENSG00000027697	13	15	12	19	7	16	9	5	12	22	18	8
ENSG00000027847	103	73	48	130	80	69	60	63	65	48	91	84
ENSG00000028116	0	1	2	0	2	0	1	2	1	0	3	1
ENSG00000028137	99	77	35	64	24	35	42	42	49	27	31	37
ENSG00000028203	275	189	151	266	232	252	163	221	299	170	320	269
ENSG00000028277	14	4	3	7	8	1	11	9	6	13	12	6
ENSG00000028310	652	380	247	588	266	322	263	387	481	282	527	445
ENSG00000028528	226	180	184	229	183	173	170	177	207	207	229	197
ENSG00000028839	62	45	66	59	83	69	44	30	52	79	60	69
ENSG00000029153	11	11	10	14	19	6	3	10	4	25	10	9
ENSG00000029363	1287	680	635	1307	567	634	537	837	1005	691	1006	903
ENSG00000029364	113	95	78	97	92	117	60	44	79	77	111	125
ENSG00000029534	59	38	30	104	72	38	15	20	8	34	40	24
ENSG00000029639	71	57	46	70	55	36	29	40	57	35	59	40
ENSG00000029725	487	381	287	554	213	313	208	353	371	259	370	404
ENSG00000029993	405	263	189	429	258	284	189	305	365	300	426	348
ENSG00000030066	31	18	27	46	44	25	27	25	37	59	41	46
ENSG00000030110	27	18	24	33	11	28	18	27	29	17	33	24
ENSG00000030419	22	33	29	28	42	68	12	31	49	31	54	46
ENSG00000030582	872	633	503	623	571	614	413	854	863	322	699	723
ENSG00000031003	101	56	45	80	66	81	52	56	67	53	63	93
ENSG00000031081	207	199	174	117	91	129	103	177	222	62	156	121
ENSG00000031691	98	64	48	202	91	91	22	50	63	95	114	131
ENSG00000031698	953	441	338	980	348	434	435	580	661	516	643	543
ENSG00000031823	273	152	138	231	162	172	86	170	174	114	181	175
ENSG00000032219	513	438	488	638	323	443	294	408	557	294	424	420
ENSG00000032389	49	43	60	61	62	39	28	26	36	28	67	40
ENSG00000032444	85	63	34	74	41	63	31	69	68	35	58	54
ENSG00000032742	126	76	61	113	41	41	61	64	81	59	45	53
ENSG00000033011	65	57	37	62	44	42	50	56	52	53	81	60
ENSG00000033030	72	68	42	75	79	35	52	39	60	61	69	51
ENSG00000033050	162	106	99	167	149	131	73	132	105	126	157	133
ENSG00000033100	76	65	66	90	83	89	71	44	52	59	114	81
ENSG00000033122	6	11	14	15	9	20	7	19	24	3	19	25
ENSG00000033170	670	426	345	465	243	366	290	484	577	245	430	411
ENSG00000033178	233	224	214	261	180	191	158	219	267	172	173	190
ENSG00000033327	392	111	86	330	150	122	191	235	236	224	211	189
ENSG00000033627	290	224	212	272	210	190	168	302	327	166	292	295
ENSG00000033800	206	163	132	166	188	172	125	167	169	155	233	193
ENSG00000033867	544	460	300	711	498	485	222	415	424	340	681	560
ENSG00000034053	227	171	137	217	130	176	95	189	246	139	232	189
ENSG00000034152	67	94	90	69	74	54	34	35	27	65	56	58
ENSG00000034510	5395	3861	3761	5892	5267	4320	2183	2486	2774	3820	6547	4920
ENSG00000034533	19	18	3	15	11	15	3	13	13	4	14	16
ENSG00000034677	1250	677	547	998	508	519	568	755	866	571	719	797
ENSG00000034693	24	16	19	21	17	17	12	22	12	11	22	27
ENSG00000034713	317	293	364	265	491	325	271	203	346	297	533	369
ENSG00000035115	71	52	46	52	76	74	43	49	61	24	85	53
ENSG00000035141	116	48	78	119	69	85	54	58	64	80	87	86
ENSG00000035403	310	200	134	490	241	181	155	179	154	225	168	192
ENSG00000035499	33	33	22	44	20	28	14	6	22	30	24	29
ENSG00000035664	16	7	5	36	6	14	2	1	11	17	17	14
ENSG00000035681	35	22	37	21	68	32	32	18	23	47	45	28
ENSG00000035687	132	101	86	152	147	100	50	68	58	85	128	91
ENSG00000035862	1528	1241	1043	1879	1312	1305	988	1611	1642	1092	2178	1839
ENSG00000035928	450	314	305	688	329	346	184	272	301	348	426	361
ENSG00000036054	64	31	44	69	53	47	26	46	52	51	46	54
ENSG00000036257	174	149	166	131	139	126	86	126	146	135	163	144
ENSG00000036448	8	6	8	8	9	13	9	12	6	0	10	12
ENSG00000036530	35	12	8	54	15	17	12	14	31	16	28	32
ENSG00000036549	187	141	99	216	138	158	112	145	189	100	166	183
ENSG00000036565	270	229	197	113	181	160	169	257	336	101	262	207
ENSG00000036672	30	16	9	18	15	20	10	31	8	12	22	24
ENSG00000037042	49	34	20	46	46	35	25	33	58	39	53	37
ENSG00000037241	77	46	78	86	103	51	59	53	62	49	98	83
ENSG00000037474	83	65	91	77	98	54	53	61	66	58	74	75
ENSG00000037637	58	45	35	70	95	58	22	38	57	33	74	58
ENSG00000037749	44	44	50	54	29	30	20	50	35	33	30	34
ENSG00000037757	47	37	66	48	53	36	27	23	58	36	46	42
ENSG00000037897	105	74	77	135	83	97	27	72	60	55	97	92
ENSG00000038002	55	26	14	65	32	30	56	34	30	52	45	41
ENSG00000038210	4	0	2	7	3	2	2	1	1	8	2	3
ENSG00000038219	723	483	516	980	429	558	424	570	823	537	623	647
ENSG00000038274	41	37	39	39	46	31	21	18	33	66	63	36
ENSG00000038382	499	350	273	404	248	259	259	370	419	314	356	363
ENSG00000038427	294	336	251	394	440	425	147	366	405	268	533	556
ENSG00000038532	49	30	39	50	42	39	22	33	44	25	47	33
ENSG00000039068	3	2	0	1	0	7	1	4	7	1	2	1
ENSG00000039123	710	514	355	826	273	457	262	505	457	294	458	479
ENSG00000039139	0	3	3	15	11	1	2	2	3	7	11	5
ENSG00000039319	138	96	78	91	118	121	51	93	120	87	98	100
ENSG00000039523	87	87	65	86	85	76	59	60	76	68	85	90
ENSG00000039560	398	312	258	597	260	330	180	247	324	205	334	304
ENSG00000039650	200	145	94	188	173	113	107	167	131	108	180	202
ENSG00000040199	33	23	32	25	20	26	16	13	28	27	27	21
ENSG00000040275	445	268	212	427	210	315	115	236	254	221	294	351
ENSG00000040341	689	501	435	646	409	457	317	497	580	272	543	498
ENSG00000040487	46	15	13	50	5	20	17	20	33	17	25	27
ENSG00000040531	38	33	16	36	40	44	12	31	26	41	27	39
ENSG00000040608	62	34	33	65	36	33	23	49	42	22	34	33
ENSG00000040633	241	204	221	192	150	213	78	221	227	102	245	276
ENSG00000040731	21	25	30	9	35	25	12	14	17	16	28	33
ENSG00000040933	97	73	77	88	87	102	48	104	111	36	109	86
ENSG00000041353	2	0	4	3	2	3	1	1	3	3	1	2
ENSG00000041357	604	309	351	746	268	424	302	384	394	348	452	401
ENSG00000041515	8	20	18	20	12	12	7	13	20	9	19	13
ENSG00000041802	256	144	127	264	193	158	113	185	191	149	200	184
ENSG00000041880	31	14	17	19	17	14	9	19	19	9	15	6
ENSG00000041982	306	116	127	374	299	212	153	129	163	402	387	307
ENSG00000041988	94	73	44	115	100	72	47	49	92	71	118	99
ENSG00000042062	7	4	0	23	5	4	2	6	8	7	11	1
ENSG00000042088	56	52	52	111	58	50	39	45	49	64	77	54
ENSG00000042286	11	8	8	9	11	6	0	5	8	4	8	10
ENSG00000042317	43	17	16	26	25	20	8	26	38	22	31	28
ENSG00000042429	58	41	57	66	54	51	32	62	48	50	54	68
ENSG00000042445	146	71	72	188	103	97	106	145	161	77	127	129
ENSG00000042493	4	5	4	12	6	6	1	9	10	7	9	8
ENSG00000042753	438	229	202	401	198	262	149	275	278	159	299	332
ENSG00000043093	45	45	39	30	38	58	26	44	41	27	44	67
ENSG00000043143	7	15	23	13	6	8	5	24	13	3	7	7
ENSG00000043355	2	1	4	0	0	1	0	0	1	0	2	1
ENSG00000043514	64	53	27	66	66	70	35	72	75	63	136	96
ENSG00000043591	4	1	1	5	0	6	2	5	5	0	0	3
ENSG00000044090	40	16	15	33	24	11	13	16	34	17	11	27
ENSG00000044115	547	364	375	594	494	409	408	367	504	543	685	539
ENSG00000044446	45	10	21	49	28	36	43	27	28	15	50	36
ENSG00000044459	178	134	119	289	73	102	67	104	132	77	92	106
ENSG00000044524	426	418	365	282	438	393	248	358	444	279	477	483
ENSG00000044574	2932	1577	1404	4121	1262	1731	973	984	1127	927	1591	1520
ENSG00000046647	30	24	17	18	26	19	12	19	25	5	11	16
ENSG00000046651	205	152	117	170	68	91	96	106	162	92	112	107
ENSG00000046653	3715	2974	2775	3422	3184	3183	2624	3213	3343	2710	4604	4013
ENSG00000046889	87	60	36	81	73	61	14	46	37	51	71	69
ENSG00000047056	24	10	19	17	17	17	7	19	8	14	15	29
ENSG00000047188	46	52	25	48	39	50	41	50	40	59	75	69
ENSG00000047230	38	26	35	39	35	23	27	35	46	31	29	30
ENSG00000047249	57	74	55	49	78	70	27	48	60	52	79	55
ENSG00000047315	258	205	212	231	300	186	148	162	214	253	301	273
ENSG00000047346	85	55	78	54	71	79	25	67	82	44	74	91
ENSG00000047365	36	25	22	14	7	16	10	30	51	12	38	19
ENSG00000047410	1424	849	716	1736	856	835	810	1043	1211	920	1084	1093
ENSG00000047457	9	10	2	6	8	2	11	6	9	18	10	12
ENSG00000047578	17	7	27	19	24	16	11	14	17	6	19	22
ENSG00000047579	80	79	64	82	66	58	33	50	70	41	70	69
ENSG00000047621	182	100	112	163	83	138	62	123	89	66	106	130
ENSG00000047634	39	32	42	33	56	21	12	15	35	32	44	38
ENSG00000047644	252	186	191	228	148	162	87	160	175	137	196	178
ENSG00000047648	4	4	4	3	2	1	2	2	3	1	2	14
ENSG00000047662	1	4	1	10	5	1	0	5	6	6	2	0
ENSG00000047849	861	469	342	832	514	399	379	488	577	492	645	585
ENSG00000047932	216	203	151	229	205	192	143	189	201	169	232	218
ENSG00000048028	73	35	29	61	26	34	24	33	51	33	33	33
ENSG00000048052	34	44	20	36	40	34	14	38	27	58	74	76
ENSG00000048140	95	64	55	87	65	57	48	70	73	52	79	77
ENSG00000048162	50	61	48	79	87	59	40	57	40	67	96	66
ENSG00000048342	77	59	65	75	71	64	52	56	84	28	53	63
ENSG00000048392	155	106	115	105	126	117	64	108	105	76	171	163
ENSG00000048405	101	64	67	107	62	67	45	90	100	74	85	96
ENSG00000048471	24	16	12	22	19	23	8	22	18	14	32	19
ENSG00000048540	10	29	36	10	51	46	7	44	37	12	47	51
ENSG00000048544	181	89	101	219	136	132	83	130	150	116	128	143
ENSG00000048649	1973	1386	1225	1754	934	1199	981	1423	1937	880	1450	1477
ENSG00000048707	105	91	72	84	52	100	69	136	123	73	121	130
ENSG00000048740	817	563	506	573	453	500	352	535	633	345	417	511
ENSG00000048828	1357	993	928	1372	836	813	847	917	1009	736	982	730
ENSG00000048991	153	119	112	176	105	102	78	106	147	97	146	109
ENSG00000049089	1	6	2	6	2	8	2	1	7	4	0	4
ENSG00000049130	19	19	23	30	49	28	7	18	30	42	58	57
ENSG00000049167	20	15	9	36	17	13	13	32	24	16	17	19
ENSG00000049192	79	75	62	42	25	31	69	107	172	14	55	62
ENSG00000049239	83	53	59	87	52	50	55	70	99	66	100	68
ENSG00000049245	120	67	67	128	61	91	40	87	65	50	97	89
ENSG00000049246	177	47	41	81	48	41	40	72	77	29	48	43
ENSG00000049323	22	19	12	25	22	19	12	25	45	9	55	33
ENSG00000049449	505	244	255	518	329	245	186	198	203	281	392	301
ENSG00000049540	15	10	1	8	10	6	9	5	14	7	17	12
ENSG00000049541	53	33	37	150	47	49	27	44	40	49	29	36
ENSG00000049618	251	145	117	245	93	116	127	166	226	149	167	176
ENSG00000049656	312	269	187	289	420	246	141	154	171	234	327	287
ENSG00000049759	194	162	109	314	136	147	114	185	193	212	251	246
ENSG00000049768	5	0	1	0	0	0	0	2	3	0	0	4
ENSG00000049769	22	24	37	23	44	30	22	20	30	21	43	24
ENSG00000049860	36	53	51	101	74	44	41	34	53	75	67	64
ENSG00000049883	36	25	14	51	46	39	27	38	22	31	48	31
ENSG00000050030	2	7	0	6	3	2	2	0	1	1	2	0
ENSG00000050130	45	44	50	39	95	33	31	29	34	73	57	66
ENSG00000050165	206	118	144	251	350	188	160	147	135	235	354	241
ENSG00000050344	8	3	1	3	3	2	2	2	1	0	2	5
ENSG00000050393	115	75	81	212	123	87	75	84	100	101	121	119
ENSG00000050405	1173	797	638	1389	756	642	438	660	833	694	968	908
ENSG00000050426	24	9	9	15	8	7	8	9	22	12	14	10
ENSG00000050438	178	120	101	127	97	124	92	152	147	96	112	132
ENSG00000050748	39	37	44	52	22	27	13	15	27	35	55	37
ENSG00000050820	93	89	101	113	108	66	53	46	40	72	110	109
ENSG00000051009	43	31	22	54	48	34	21	20	33	25	44	36
ENSG00000051108	76	54	52	120	78	53	53	33	36	95	55	55
ENSG00000051128	686	523	453	466	292	547	183	404	489	200	436	538
ENSG00000051180	35	23	16	78	41	29	13	13	17	43	30	14
ENSG00000051341	39	33	29	71	37	31	10	33	31	56	48	34
ENSG00000051382	41	39	31	43	50	41	26	28	58	43	69	42
ENSG00000051523	2	1	0	2	0	1	0	0	1	2	0	3
ENSG00000051596	10	8	9	11	19	7	6	1	3	10	13	6
ENSG00000051620	90	74	61	148	71	77	45	84	90	51	88	80
ENSG00000051825	294	189	145	345	134	218	117	174	220	149	249	234
ENSG00000052126	130	74	79	133	62	73	47	77	97	74	121	89
ENSG00000052723	53	42	44	43	49	40	21	45	43	36	56	54
ENSG00000052749	95	38	32	79	47	52	31	46	59	38	48	67
ENSG00000052795	78	68	54	53	82	58	20	42	62	42	100	75
ENSG00000052802	1160	360	478	757	313	377	333	316	364	410	619	510
ENSG00000052841	318	223	191	246	195	227	139	264	329	162	307	255
ENSG00000053254	446	449	484	734	472	539	278	366	451	307	564	495
ENSG00000053371	103	84	84	111	137	93	45	64	59	70	122	84
ENSG00000053372	227	112	104	341	151	124	103	143	113	113	183	157
ENSG00000053438	6	3	2	8	6	4	2	7	7	6	5	9
ENSG00000053501	61	45	34	62	29	33	31	37	31	25	49	43
ENSG00000053524	0	1	1	0	0	0	3	10	2	3	2	2
ENSG00000053770	71	63	57	81	40	39	41	55	67	43	60	59
ENSG00000053900	74	49	42	109	45	38	60	54	64	71	54	62
ENSG00000054116	188	162	109	224	127	132	106	107	176	129	179	149
ENSG00000054118	1010	624	524	1166	469	574	504	686	787	684	817	738
ENSG00000054148	760	723	752	787	988	787	333	611	608	524	1063	859
ENSG00000054179	2	1	0	2	0	0	2	2	0	1	0	0
ENSG00000054267	615	418	436	695	425	490	352	472	680	466	649	600
ENSG00000054277	29	28	35	36	30	30	23	23	22	28	28	29
ENSG00000054282	264	145	110	309	143	148	123	211	226	102	194	181
ENSG00000054356	9	1	0	5	2	1	1	7	1	6	1	5
ENSG00000054392	9	10	7	13	9	2	6	13	9	8	11	11
ENSG00000054523	1847	1242	1052	1374	968	1092	898	1519	1759	711	1377	1335
ENSG00000054598	1	12	3	1	14	10	0	14	11	0	7	15
ENSG00000054611	139	73	54	105	60	49	44	84	111	57	104	100
ENSG00000054654	550	473	320	718	386	504	224	521	613	411	643	703
ENSG00000054690	8	3	5	10	3	4	3	7	7	8	2	13
ENSG00000054793	296	268	196	317	315	252	171	271	302	233	366	362
ENSG00000054803	3	2	3	0	7	2	0	2	3	0	6	7
ENSG00000054965	254	171	130	158	188	171	171	232	226	133	216	241
ENSG00000054967	33	18	19	37	30	33	12	29	13	36	29	28
ENSG00000054983	17	27	25	31	22	47	11	41	40	19	53	47
ENSG00000055044	320	214	206	614	213	208	160	185	240	254	340	294
ENSG00000055070	429	358	226	339	250	296	196	261	261	207	339	373
ENSG00000055118	60	43	37	71	79	64	35	41	54	24	85	96
ENSG00000055130	147	122	127	171	115	106	79	112	100	130	172	115
ENSG00000055147	95	69	43	122	68	61	39	63	92	45	61	113
ENSG00000055163	464	366	279	492	270	321	183	408	428	226	390	321
ENSG00000055208	76	72	66	74	86	101	36	69	79	64	67	72
ENSG00000055211	226	185	104	255	138	126	111	183	203	160	187	155
ENSG00000055332	349	261	257	385	308	242	178	279	271	231	358	297
ENSG00000055483	193	143	119	197	154	145	106	164	150	130	193	215
ENSG00000055609	659	623	500	742	382	578	333	736	916	331	707	682
ENSG00000055917	151	108	142	165	92	103	75	94	159	106	133	151
ENSG00000055950	199	179	141	235	168	185	121	129	151	149	219	195
ENSG00000055955	1	0	0	3	0	1	0	2	1	1	0	1
ENSG00000056050	85	71	58	124	74	67	57	55	70	78	86	53
ENSG00000056097	1211	924	731	1288	430	776	584	897	1149	507	740	719
ENSG00000056277	21	24	13	35	12	15	8	24	22	12	24	25
ENSG00000056487	72	115	65	89	81	69	89	95	146	109	140	82
ENSG00000056558	4	3	3	1	1	2	0	6	1	0	0	0
ENSG00000056586	275	266	176	301	168	186	143	259	282	195	209	235
ENSG00000056736	1	0	3	0	7	0	0	1	0	1	0	4
ENSG00000056972	64	60	60	50	49	56	49	26	39	19	49	50
ENSG00000056998	91	90	74	107	79	56	82	103	98	53	145	70
ENSG00000057019	268	137	103	278	155	138	118	94	141	280	256	196
ENSG00000057252	56	25	30	44	36	28	9	15	24	30	40	33
ENSG00000057593	0	3	0	2	0	0	0	3	0	0	2	2
ENSG00000057608	601	510	372	798	437	350	364	379	466	537	535	487
ENSG00000057657	40	17	8	36	15	8	9	14	8	16	5	14
ENSG00000057663	27	25	18	39	29	25	8	21	31	25	37	28
ENSG00000057704	0	0	6	2	0	0	0	0	0	0	4	1
ENSG00000057757	46	39	50	82	86	59	24	43	29	60	66	61
ENSG00000057935	34	41	51	37	43	57	31	31	44	28	41	66
ENSG00000058056	139	109	96	169	145	98	71	67	91	106	161	142
ENSG00000058063	52	33	43	35	46	37	30	24	47	37	48	35
ENSG00000058091	155	139	90	217	126	168	58	111	148	111	203	160
ENSG00000058262	365	295	180	436	258	310	144	233	275	210	355	366
ENSG00000058272	738	479	497	850	426	432	298	484	560	387	543	478
ENSG00000058404	2	3	0	1	1	1	4	0	5	7	9	3
ENSG00000058453	25	22	44	23	13	14	33	20	17	10	22	22
ENSG00000058600	32	19	23	43	35	24	18	20	31	33	34	26
ENSG00000058668	100	82	78	97	63	64	59	103	128	107	90	61
ENSG00000058673	281	187	175	256	204	192	144	206	242	200	211	209
ENSG00000058729	34	23	18	35	41	35	26	26	39	44	42	45
ENSG00000058799	58	42	38	89	53	38	46	49	59	35	59	49
ENSG00000058804	65	53	41	102	60	47	33	30	54	36	53	35
ENSG00000059122	37	43	38	59	33	41	26	28	45	20	32	39
ENSG00000059145	27	17	12	31	36	18	22	27	31	29	41	24
ENSG00000059377	3	2	2	3	0	2	1	0	1	0	2	3
ENSG00000059378	2	5	0	6	2	1	3	3	3	1	5	2
ENSG00000059573	31	53	67	54	102	58	38	30	20	38	71	42
ENSG00000059588	21	17	14	20	16	7	25	33	28	14	9	15
ENSG00000059691	38	34	29	58	21	34	24	33	36	40	43	35
ENSG00000059728	50	27	25	32	26	32	12	35	28	34	66	42
ENSG00000059758	40	64	65	30	77	51	41	42	51	63	69	73
ENSG00000059769	65	41	44	57	38	44	43	39	45	25	50	42
ENSG00000059804	168	174	169	108	115	132	101	187	270	90	121	101
ENSG00000059915	76	77	83	63	98	85	54	94	119	38	94	90
ENSG00000060069	28	28	29	34	35	23	42	30	35	38	52	45
ENSG00000060138	490	222	199	489	362	295	185	214	264	292	376	289
ENSG00000060237	795	610	440	684	535	548	353	604	769	409	716	684
ENSG00000060339	1245	761	807	1502	567	819	695	874	1092	956	1031	1106
ENSG00000060491	116	94	50	148	98	95	67	154	122	98	98	124
ENSG00000060642	17	4	10	8	10	25	11	14	17	8	19	15
ENSG00000060656	30	24	8	80	26	16	9	12	17	8	29	14
ENSG00000060688	21	21	10	34	13	25	13	10	17	22	28	30
ENSG00000060709	56	26	30	17	18	25	15	21	31	8	29	20
ENSG00000060718	889	307	170	932	318	301	220	325	277	540	498	608
ENSG00000060749	437	343	274	409	255	340	176	286	376	211	404	348
ENSG00000060762	967	364	294	324	313	383	266	462	571	220	407	480
ENSG00000060971	110	81	68	150	84	75	81	76	106	92	99	82
ENSG00000060982	792	487	421	628	590	396	383	375	389	343	670	586
ENSG00000061273	750	493	274	1331	277	251	487	520	618	424	410	382
ENSG00000061337	192	137	117	133	134	82	36	70	68	72	105	133
ENSG00000061455	1	0	1	0	0	1	0	0	3	3	1	0
ENSG00000061676	163	140	138	137	179	170	98	140	166	99	223	140
ENSG00000061794	135	114	117	185	114	110	64	97	88	101	127	112
ENSG00000061918	40	21	13	37	24	18	17	16	18	21	22	18
ENSG00000061936	615	452	323	598	373	404	254	518	549	339	529	450
ENSG00000061938	453	212	167	332	246	222	216	254	248	202	305	254
ENSG00000061987	60	49	38	64	61	54	26	57	52	52	64	68
ENSG00000062038	0	1	0	0	1	0	0	5	1	2	0	0
ENSG00000062194	473	374	297	458	353	429	226	373	434	356	504	443
ENSG00000062370	9	14	15	3	22	13	7	9	6	11	14	8
ENSG00000062485	163	116	150	186	187	146	103	137	146	206	182	197
ENSG00000062524	2	0	0	0	1	0	2	3	1	0	1	0
ENSG00000062582	6	1	1	8	0	1	0	3	5	2	3	1
ENSG00000062598	119	79	55	90	70	51	68	80	84	62	74	71
ENSG00000062650	278	222	162	288	151	195	102	201	245	139	205	229
ENSG00000062716	455	240	178	302	271	260	166	181	187	167	334	330
ENSG00000062725	171	133	153	131	152	150	93	162	168	161	192	183
ENSG00000062822	25	19	10	30	17	24	11	8	16	14	16	50
ENSG00000063015	1267	610	594	1413	821	731	987	678	773	1028	1010	853
ENSG00000063046	359	207	222	225	276	211	149	251	320	188	277	253
ENSG00000063127	4	9	1	25	3	4	15	16	22	21	19	7
ENSG00000063169	12	13	11	7	21	15	14	10	9	18	21	20
ENSG00000063176	131	92	64	119	68	97	48	109	107	77	133	100
ENSG00000063177	2418	2070	2114	2487	2796	2293	1277	1895	1865	1470	3079	2620
ENSG00000063180	52	58	56	39	30	58	47	63	82	44	57	93
ENSG00000063241	63	40	25	38	23	34	38	41	50	28	31	29
ENSG00000063244	759	587	417	784	426	505	310	555	584	380	597	578
ENSG00000063245	312	219	179	341	193	254	122	216	228	151	196	269
ENSG00000063322	147	118	92	174	113	133	82	146	156	84	155	139
ENSG00000063438	35	18	26	26	24	15	6	42	30	29	51	41
ENSG00000063587	100	110	98	68	125	121	50	101	122	60	147	138
ENSG00000063601	46	28	44	62	66	43	20	30	48	46	79	60
ENSG00000063660	1257	559	553	1266	823	648	765	788	720	920	1018	979
ENSG00000063761	30	22	17	9	12	10	8	22	19	4	9	16
ENSG00000063854	209	150	139	214	172	145	100	122	141	109	218	209
ENSG00000063978	40	42	49	58	31	39	19	36	40	21	30	58
ENSG00000064012	4	5	5	1	10	4	3	2	4	12	2	3
ENSG00000064042	462	200	219	695	326	268	204	287	274	367	405	410
ENSG00000064102	139	92	65	169	112	107	59	108	103	70	93	86
ENSG00000064115	226	210	219	255	250	185	156	148	189	162	196	180
ENSG00000064199	119	62	22	100	49	60	29	80	55	52	64	43
ENSG00000064225	21	52	35	15	31	42	24	31	53	12	33	39
ENSG00000064300	1169	695	520	1694	864	767	320	487	570	584	811	1014
ENSG00000064309	15	8	3	17	24	6	10	8	1	21	11	18
ENSG00000064313	165	100	101	213	110	91	63	119	137	144	122	125
ENSG00000064393	660	624	604	540	637	605	361	502	536	473	819	785
ENSG00000064419	406	310	232	464	227	267	150	211	270	231	268	290
ENSG00000064490	64	53	52	74	63	51	61	62	48	59	86	59
ENSG00000064545	143	88	61	102	71	104	69	126	98	41	95	107
ENSG00000064547	218	60	60	113	42	80	107	89	106	48	84	70
ENSG00000064601	132	83	68	143	71	105	70	124	113	59	121	113
ENSG00000064607	818	468	342	809	405	400	399	556	604	515	604	496
ENSG00000064651	331	230	209	333	220	233	179	234	236	225	334	341
ENSG00000064652	46	38	52	102	41	32	29	33	38	34	62	70
ENSG00000064655	0	1	0	0	1	4	0	4	6	0	0	1
ENSG00000064666	644	386	343	1045	324	403	131	207	196	258	343	335
ENSG00000064687	1	1	3	4	5	4	3	5	7	2	1	1
ENSG00000064692	132	94	57	115	125	145	70	100	111	88	139	197
ENSG00000064703	78	76	70	47	57	59	25	63	64	50	53	90
ENSG00000064726	28	34	19	27	24	28	12	14	27	8	27	22
ENSG00000064763	2	0	2	3	1	1	0	0	1	1	3	3
ENSG00000064787	4	1	2	2	1	0	0	0	5	0	3	2
ENSG00000064932	31	22	26	30	27	30	17	23	26	22	36	24
ENSG00000064933	93	73	76	91	113	68	28	57	63	60	77	64
ENSG00000064961	218	177	170	191	155	178	88	168	146	109	183	208
ENSG00000064989	3	0	3	8	7	7	4	7	8	7	12	14
ENSG00000064995	245	192	143	332	131	176	147	187	242	180	240	221
ENSG00000064999	67	46	26	46	32	48	38	54	77	35	61	46
ENSG00000065000	1102	655	606	1285	473	587	490	711	788	517	739	675
ENSG00000065029	103	67	53	108	58	72	64	72	98	53	94	86
ENSG00000065054	39	15	14	31	20	16	14	21	26	15	15	22
ENSG00000065057	45	44	56	57	33	29	19	36	26	32	58	45
ENSG00000065060	21	20	26	35	33	26	14	15	21	28	22	35
ENSG00000065135	343	261	232	371	274	274	178	280	302	270	324	319
ENSG00000065150	367	247	266	506	306	293	163	228	225	293	394	312
ENSG00000065154	18	31	32	15	45	15	24	14	19	33	40	17
ENSG00000065183	177	125	139	153	145	149	72	117	145	102	186	158
ENSG00000065243	295	194	160	258	162	204	119	208	252	193	223	262
ENSG00000065268	286	164	134	266	181	185	121	253	236	107	217	275
ENSG00000065308	181	115	165	245	192	124	74	108	100	140	136	168
ENSG00000065320	786	568	442	612	456	560	513	735	748	309	655	635
ENSG00000065328	168	161	131	386	161	162	56	88	90	221	165	208
ENSG00000065357	88	64	12	99	48	19	23	51	93	26	60	48
ENSG00000065361	46	54	59	16	48	38	34	108	130	9	49	63
ENSG00000065413	20	11	9	17	11	13	15	16	31	15	30	27
ENSG00000065427	463	360	341	510	322	343	237	282	330	281	439	452
ENSG00000065457	100	50	41	129	66	91	49	62	89	67	85	61
ENSG00000065485	28	23	10	21	40	29	27	23	37	21	42	28
ENSG00000065491	20	14	8	14	28	19	16	19	15	22	16	29
ENSG00000065518	320	245	287	360	405	283	170	205	256	291	437	312
ENSG00000065526	685	471	350	639	448	508	313	539	645	405	626	608
ENSG00000065534	177	61	51	411	97	60	64	58	82	158	106	126
ENSG00000065548	1222	750	669	1304	577	732	533	773	802	593	837	741
ENSG00000065559	60	49	45	71	35	41	32	55	49	35	45	47
ENSG00000065600	59	50	51	74	59	67	41	50	66	33	106	52
ENSG00000065609	6	4	1	0	5	6	1	0	3	0	2	1
ENSG00000065613	546	332	367	630	247	235	246	349	425	348	381	373
ENSG00000065615	47	23	35	48	27	35	19	29	41	21	44	48
ENSG00000065621	2	1	1	1	8	0	1	3	3	0	3	6
ENSG00000065665	50	51	57	59	49	46	36	21	45	45	44	43
ENSG00000065675	2	0	0	0	0	2	1	1	1	0	3	0
ENSG00000065717	15	22	21	5	12	21	6	11	9	3	12	9
ENSG00000065802	133	108	56	237	79	74	96	132	145	110	120	111
ENSG00000065809	94	94	82	114	77	95	62	102	123	80	167	134
ENSG00000065833	32	1	11	24	13	4	10	4	4	13	18	19
ENSG00000065882	50	51	35	86	44	54	12	47	38	29	70	74
ENSG00000065883	151	74	96	85	108	100	56	95	142	83	121	114
ENSG00000065911	45	31	30	66	53	40	20	19	28	60	53	42
ENSG00000065923	111	48	25	149	63	31	60	37	41	95	68	68
ENSG00000065970	66	58	47	90	73	47	35	51	59	88	79	60
ENSG00000065978	6004	3448	2510	5401	3646	3155	2031	3153	3493	2939	4507	3887
ENSG00000065989	10	21	13	13	12	17	17	30	16	15	27	33
ENSG00000066027	81	75	68	56	57	51	31	48	70	59	58	60
ENSG00000066032	2	4	0	0	0	2	1	0	2	2	0	0
ENSG00000066044	247	264	235	222	312	226	130	177	193	192	303	250
ENSG00000066056	0	1	5	2	0	2	5	1	0	4	3	2
ENSG00000066084	176	87	104	102	124	123	66	124	159	75	127	171
ENSG00000066117	228	172	136	162	118	167	94	181	184	132	225	220
ENSG00000066135	354	269	192	335	172	242	175	264	300	233	322	293
ENSG00000066136	83	74	69	111	107	59	65	30	75	59	82	60
ENSG00000066248	18	7	13	26	16	10	19	8	5	18	17	17
ENSG00000066279	644	427	373	769	222	319	269	329	503	436	481	387
ENSG00000066322	216	72	72	112	63	90	47	105	103	39	111	97
ENSG00000066379	17	25	22	34	59	22	29	25	28	35	41	36
ENSG00000066422	85	75	56	83	51	77	61	76	94	20	86	76
ENSG00000066427	118	84	49	85	44	72	56	97	128	97	105	74
ENSG00000066455	68	44	33	46	48	34	30	39	62	33	48	57
ENSG00000066468	138	106	113	94	128	123	63	138	161	65	118	145
ENSG00000066557	50	36	37	41	38	56	27	24	46	27	62	40
ENSG00000066583	34	40	46	30	45	29	18	15	26	14	30	27
ENSG00000066629	57	21	36	75	29	20	27	23	28	48	42	68
ENSG00000066651	29	30	24	20	14	22	17	32	20	32	57	40
ENSG00000066654	137	108	85	153	106	130	89	114	125	93	126	141
ENSG00000066697	86	54	39	99	55	78	31	31	61	41	94	60
ENSG00000066735	2	4	0	2	8	6	3	1	2	0	4	1
ENSG00000066739	34	33	27	37	50	44	30	50	48	42	70	50
ENSG00000066777	169	112	87	152	107	120	88	173	163	135	156	150
ENSG00000066827	24	34	16	29	23	49	13	17	26	24	18	35
ENSG00000066855	25	8	26	21	33	21	9	9	21	19	18	30
ENSG00000066923	4	4	0	5	2	0	4	8	0	2	2	2
ENSG00000066926	15	12	15	31	27	17	11	12	18	25	29	28
ENSG00000066933	192	155	92	147	107	107	74	135	180	112	125	126
ENSG00000067048	151	127	133	98	107	118	78	116	105	96	150	125
ENSG00000067057	89	62	35	171	87	64	32	48	82	92	103	113
ENSG00000067064	466	143	218	265	190	156	183	111	214	263	320	289
ENSG00000067066	7	3	2	5	3	3	4	8	1	10	8	6
ENSG00000067082	540	275	294	512	305	284	354	326	379	529	639	520
ENSG00000067113	26	26	19	49	26	17	10	13	17	13	38	24
ENSG00000067141	324	385	318	224	281	311	169	272	355	158	412	416
ENSG00000067167	81	65	67	85	79	69	48	59	68	70	133	95
ENSG00000067177	3	0	0	1	5	4	3	1	1	3	5	1
ENSG00000067182	259	178	186	178	199	138	154	157	189	195	218	198
ENSG00000067191	27	20	13	16	12	20	15	15	35	26	24	23
ENSG00000067208	377	222	162	311	177	252	169	266	315	187	316	281
ENSG00000067221	23	22	20	34	22	19	10	28	22	19	29	32
ENSG00000067225	2160	1085	778	2284	1088	1232	496	1113	1188	1058	1508	1513
ENSG00000067248	226	161	139	241	109	160	113	191	212	115	163	195
ENSG00000067334	286	214	177	401	170	228	188	236	252	229	277	239
ENSG00000067365	47	18	23	47	33	11	33	15	41	32	47	38
ENSG00000067369	639	470	368	584	363	435	322	489	548	286	507	485
ENSG00000067445	284	239	244	187	167	187	186	257	364	155	252	206
ENSG00000067533	155	120	135	211	116	161	99	109	145	112	165	190
ENSG00000067560	839	783	817	1100	1131	974	658	700	939	908	1275	1163
ENSG00000067596	122	108	69	83	102	90	55	91	96	98	140	119
ENSG00000067606	53	17	24	48	33	39	23	40	36	23	47	38
ENSG00000067646	58	37	32	57	28	23	22	45	54	46	50	57
ENSG00000067704	102	81	77	70	68	66	36	63	61	43	122	100
ENSG00000067715	950	695	645	744	906	855	455	1001	1330	533	1203	1183
ENSG00000067798	19	9	9	16	5	6	6	9	10	14	17	22
ENSG00000067829	177	116	86	151	88	105	57	130	152	98	154	153
ENSG00000067836	89	65	36	88	34	46	44	60	91	59	62	46
ENSG00000067840	105	59	69	81	63	68	27	63	77	47	121	115
ENSG00000067900	667	411	450	781	336	387	287	449	515	388	442	433
ENSG00000067955	161	114	88	139	116	101	56	71	93	66	122	108
ENSG00000067992	13	5	12	11	12	7	8	9	5	6	15	7
ENSG00000068001	95	77	113	101	120	107	56	63	61	41	123	128
ENSG00000068024	43	41	22	64	38	67	47	38	32	43	47	47
ENSG00000068028	29	17	14	43	18	15	16	12	31	17	36	24
ENSG00000068078	106	102	91	188	141	144	88	93	128	78	135	128
ENSG00000068079	3	6	7	9	9	2	8	2	4	2	4	3
ENSG00000068097	173	106	71	144	56	96	77	94	118	58	139	137
ENSG00000068120	86	85	54	106	52	68	42	77	77	44	49	67
ENSG00000068137	78	50	71	35	69	49	43	61	44	42	69	66
ENSG00000068305	45	46	53	52	38	43	31	43	71	49	51	47
ENSG00000068308	284	198	148	251	128	195	120	209	216	176	238	251
ENSG00000068323	179	104	74	166	71	121	110	175	134	78	150	148
ENSG00000068354	51	36	35	52	42	48	26	32	43	31	46	36
ENSG00000068366	57	26	35	38	41	36	24	11	25	38	47	30
ENSG00000068383	113	92	63	143	80	112	72	87	85	75	105	114
ENSG00000068394	34	26	36	64	23	34	28	35	24	21	43	49
ENSG00000068400	858	493	336	696	379	415	350	687	776	304	617	616
ENSG00000068438	40	40	50	83	48	38	23	15	24	33	52	35
ENSG00000068489	962	516	354	1043	389	437	338	589	643	397	452	434
ENSG00000068615	17	18	14	21	18	19	12	14	26	29	39	20
ENSG00000068650	50	61	54	43	35	57	27	56	57	23	56	81
ENSG00000068654	166	122	93	188	67	111	90	103	151	107	132	137
ENSG00000068697	787	637	600	1005	727	788	449	713	840	633	1066	864
ENSG00000068724	15	9	7	9	12	7	6	15	6	3	15	14
ENSG00000068745	434	287	284	289	342	298	242	295	385	220	393	345
ENSG00000068784	139	86	94	144	60	94	51	99	90	64	76	89
ENSG00000068796	362	244	184	351	200	254	157	230	292	212	233	266
ENSG00000068831	8	13	18	1	12	8	4	15	13	1	6	2
ENSG00000068878	186	142	130	228	94	136	129	156	178	151	229	179
ENSG00000068885	21	21	22	17	15	24	15	22	35	18	18	20
ENSG00000068903	84	69	85	88	114	89	32	90	109	54	114	96
ENSG00000068912	265	158	141	170	172	190	110	162	148	101	222	214
ENSG00000068971	63	56	36	60	27	64	35	57	53	18	40	38
ENSG00000068976	2	3	3	0	0	0	0	1	0	0	0	2
ENSG00000069020	70	42	38	63	58	59	29	70	77	33	73	37
ENSG00000069188	11	26	16	10	12	19	9	34	44	8	26	20
ENSG00000069248	97	89	86	139	112	90	71	105	84	57	96	117
ENSG00000069275	8136	5045	4079	10433	4006	4683	3202	4480	5045	4532	5807	5966
ENSG00000069329	615	411	442	514	373	460	322	451	453	380	552	489
ENSG00000069345	303	171	158	224	177	174	131	180	212	184	248	211
ENSG00000069399	30	41	31	28	15	17	14	37	40	12	17	23
ENSG00000069424	7	13	3	8	14	12	4	15	10	2	13	4
ENSG00000069431	9	23	24	4	10	14	1	5	15	6	19	21
ENSG00000069493	21	27	11	50	13	40	16	38	47	24	47	25
ENSG00000069509	88	56	66	87	73	67	42	51	74	44	63	65
ENSG00000069535	31	40	63	18	47	39	25	19	14	40	54	48
ENSG00000069667	5	4	1	11	7	6	4	13	14	5	10	14
ENSG00000069696	2	1	0	0	0	0	0	0	1	14	2	0
ENSG00000069702	0	3	1	0	0	2	0	3	2	0	6	2
ENSG00000069712	15	5	16	14	12	5	0	16	7	0	6	5
ENSG00000069812	11	1	7	42	30	24	7	10	2	63	59	45
ENSG00000069849	283	193	224	539	196	197	147	176	248	238	291	289
ENSG00000069869	87	46	54	97	59	42	29	38	33	58	56	38
ENSG00000069943	11	3	9	8	16	5	6	6	10	9	7	15
ENSG00000069956	303	207	241	297	219	227	130	169	187	187	224	228
ENSG00000069966	100	82	78	165	83	97	66	73	81	75	113	107
ENSG00000069974	7	1	6	18	10	8	0	3	4	21	7	12
ENSG00000069998	65	76	82	69	112	50	62	37	40	75	99	68
ENSG00000070010	154	88	119	252	76	139	78	106	115	144	137	149
ENSG00000070018	169	134	160	175	180	159	144	169	220	170	252	265
ENSG00000070047	283	253	209	332	237	212	186	230	249	179	358	268
ENSG00000070061	50	59	52	52	52	36	25	38	32	23	41	42
ENSG00000070081	287	183	222	461	191	181	106	118	176	180	240	220
ENSG00000070087	449	482	600	616	988	589	327	374	439	651	928	735
ENSG00000070159	17	24	18	11	32	27	15	27	34	29	52	47
ENSG00000070214	308	208	168	360	332	214	158	290	330	225	349	345
ENSG00000070269	40	19	30	31	26	53	23	28	33	30	42	32
ENSG00000070366	199	148	110	183	113	116	100	139	165	110	137	140
ENSG00000070367	180	111	137	180	161	143	92	122	144	148	140	167
ENSG00000070371	9	7	2	0	4	8	2	9	1	2	4	5
ENSG00000070388	2	2	0	3	7	4	1	3	4	4	6	1
ENSG00000070404	2	4	9	9	7	2	2	2	1	5	3	3
ENSG00000070413	223	193	137	235	224	212	153	194	188	176	357	301
ENSG00000070423	160	165	101	203	174	156	121	121	121	134	245	157
ENSG00000070444	104	57	46	98	29	50	55	61	86	59	84	96
ENSG00000070476	75	44	18	86	40	35	29	64	54	72	39	53
ENSG00000070495	72	67	58	97	69	67	22	56	56	49	62	56
ENSG00000070501	39	29	23	44	17	41	17	37	43	12	47	44
ENSG00000070540	66	26	23	45	35	39	26	53	44	46	69	48
ENSG00000070601	1	2	1	0	2	4	0	1	1	0	2	3
ENSG00000070610	121	92	73	136	62	92	76	99	129	67	90	93
ENSG00000070614	523	363	274	478	308	419	264	486	477	231	495	501
ENSG00000070669	162	24	17	141	27	28	66	59	64	139	54	42
ENSG00000070718	111	129	111	149	106	99	77	91	106	106	120	109
ENSG00000070729	0	3	3	0	6	2	1	3	3	0	3	1
ENSG00000070756	4509	2759	2513	3345	2402	3054	1729	2597	2832	2044	3298	3282
ENSG00000070759	6	2	3	11	4	6	2	4	2	16	3	5
ENSG00000070761	52	54	81	79	91	55	35	20	41	72	68	44
ENSG00000070770	244	184	179	269	203	204	140	158	187	181	262	272
ENSG00000070778	50	53	75	34	27	28	34	64	42	48	32	40
ENSG00000070785	107	69	79	166	66	92	56	89	79	59	114	79
ENSG00000070808	282	121	91	139	52	121	93	146	131	50	60	44
ENSG00000070814	193	135	116	327	107	125	110	116	145	165	139	135
ENSG00000070831	478	377	438	494	507	451	271	348	440	394	685	540
ENSG00000070882	67	28	24	69	24	23	25	16	29	38	32	39
ENSG00000070950	96	62	69	123	51	62	29	45	67	72	93	56
ENSG00000070961	569	417	464	438	403	413	348	459	615	461	637	582
ENSG00000071051	132	121	93	123	102	105	48	104	99	100	118	133
ENSG00000071054	3277	1453	1317	2674	1394	1635	1429	1829	2227	1536	2077	2239
ENSG00000071073	25	27	16	17	20	10	14	18	37	13	20	30
ENSG00000071082	1759	1442	1809	2620	1936	1631	1288	1452	1700	1641	2515	1926
ENSG00000071127	424	342	278	548	356	298	176	185	229	255	390	299
ENSG00000071189	107	88	86	66	111	94	62	84	100	84	148	134
ENSG00000071205	22	12	17	46	24	20	19	19	14	34	27	27
ENSG00000071242	382	333	285	268	333	278	200	278	293	183	357	339
ENSG00000071243	274	195	191	206	229	261	141	181	232	176	352	291
ENSG00000071246	306	212	179	266	207	166	138	209	226	132	279	228
ENSG00000071282	13	8	7	18	9	6	6	8	7	9	5	3
ENSG00000071462	147	176	80	299	116	92	123	161	165	135	155	142
ENSG00000071537	239	170	142	235	192	186	104	176	208	108	221	232
ENSG00000071539	31	22	15	58	36	12	11	9	11	36	34	27
ENSG00000071553	963	688	517	730	543	560	479	692	727	420	790	677
ENSG00000071564	524	468	378	647	520	425	391	477	535	497	679	530
ENSG00000071575	6099	4760	3469	4004	2864	3829	2946	4496	4958	1847	3254	3202
ENSG00000071626	422	346	220	469	250	282	194	278	307	292	332	368
ENSG00000071655	274	171	171	216	130	170	90	204	170	123	250	248
ENSG00000071794	257	222	172	317	127	170	99	187	219	146	171	207
ENSG00000071859	175	90	103	177	99	115	88	125	146	111	138	154
ENSG00000071889	83	57	55	93	92	67	47	58	67	47	76	71
ENSG00000071894	246	210	154	259	182	201	84	183	176	139	224	203
ENSG00000071909	2	2	0	2	0	1	3	3	0	1	3	2
ENSG00000071967	32	12	27	21	25	17	12	13	22	17	16	20
ENSG00000071994	72	74	75	106	99	93	55	74	76	74	74	101
ENSG00000072042	1023	426	448	968	494	451	447	568	746	529	747	685
ENSG00000072062	207	212	159	307	190	156	140	169	125	162	245	191
ENSG00000072071	88	182	127	102	186	175	84	200	237	79	261	263
ENSG00000072110	1892	1322	1318	2320	1105	965	563	532	575	828	1102	1004
ENSG00000072121	47	43	33	69	27	37	18	51	67	40	58	40
ENSG00000072133	10	3	4	15	8	11	5	1	11	11	8	9
ENSG00000072134	350	241	222	220	177	232	118	241	270	160	261	238
ENSG00000072135	20	15	12	22	13	12	17	15	18	16	21	6
ENSG00000072163	25	2	3	20	16	11	3	10	11	13	8	17
ENSG00000072182	33	13	0	3	0	7	10	14	17	10	2	9
ENSG00000072195	399	301	229	559	258	206	240	271	318	190	260	218
ENSG00000072210	80	53	60	72	43	69	41	64	79	48	52	59
ENSG00000072274	126	95	83	118	205	81	56	70	81	139	252	178
ENSG00000072310	53	29	45	54	35	35	42	35	48	53	46	58
ENSG00000072364	462	287	283	457	256	280	232	378	432	308	432	421
ENSG00000072401	47	46	50	59	81	57	32	27	40	45	69	46
ENSG00000072415	160	174	189	249	165	167	88	129	169	136	188	196
ENSG00000072422	58	45	30	57	44	28	25	40	41	28	41	69
ENSG00000072501	1549	904	772	2210	569	754	672	783	909	996	1059	939
ENSG00000072506	209	141	160	214	224	137	107	175	199	120	212	213
ENSG00000072518	242	178	149	199	164	165	111	156	171	125	186	235
ENSG00000072571	222	116	89	248	64	94	73	69	93	83	105	85
ENSG00000072609	77	54	55	74	50	42	46	65	73	50	67	65
ENSG00000072682	14	17	11	27	15	14	15	22	18	27	13	18
ENSG00000072736	199	147	138	236	166	152	98	142	158	211	204	167
ENSG00000072756	78	39	40	45	50	42	26	25	34	32	42	46
ENSG00000072778	220	219	182	247	218	211	152	163	190	194	324	245
ENSG00000072786	100	77	44	87	37	32	41	69	77	36	63	47
ENSG00000072803	136	150	151	115	167	150	79	106	153	104	155	148
ENSG00000072818	0	1	5	7	0	4	7	4	4	8	1	7
ENSG00000072832	459	291	353	342	444	269	307	253	316	395	437	344
ENSG00000072840	14	18	8	18	19	16	7	17	19	7	13	24
ENSG00000072849	103	88	77	133	78	94	49	57	81	55	124	66
ENSG00000072864	409	304	246	312	167	205	197	270	374	145	188	225
ENSG00000072952	23	38	21	24	49	43	6	39	42	11	59	45
ENSG00000072954	30	17	31	41	18	16	19	39	42	22	32	35
ENSG00000072958	158	161	194	249	175	166	64	193	195	128	203	166
ENSG00000073008	100	48	34	151	54	47	34	87	75	35	74	53
ENSG00000073050	145	98	100	249	93	95	64	91	133	96	121	97
ENSG00000073060	78	37	42	48	70	56	40	36	39	36	61	63
ENSG00000073111	132	156	134	300	237	180	47	56	65	220	191	185
ENSG00000073150	2	4	7	2	8	1	2	3	7	2	6	5
ENSG00000073169	31	24	32	29	43	28	25	30	43	23	39	38
ENSG00000073331	1	0	0	0	1	2	1	5	4	0	0	3
ENSG00000073350	1	1	0	2	1	0	3	1	0	3	3	2
ENSG00000073417	18	25	10	40	13	13	12	29	36	36	19	26
ENSG00000073464	39	17	20	24	39	25	17	29	41	14	26	31
ENSG00000073536	17	16	22	34	33	26	21	13	23	8	27	34
ENSG00000073578	53	73	97	127	70	79	58	74	88	71	129	95
ENSG00000073584	318	259	204	312	270	259	173	237	305	247	424	371
ENSG00000073605	22	9	9	9	5	10	7	15	10	8	28	5
ENSG00000073614	724	516	384	790	408	527	380	541	741	463	669	605
ENSG00000073670	0	0	2	0	6	0	0	0	0	1	0	1
ENSG00000073711	72	36	46	65	45	59	44	50	66	42	66	67
ENSG00000073712	420	372	405	437	533	391	233	309	302	284	423	413
ENSG00000073792	753	401	346	785	298	281	296	413	511	359	475	509
ENSG00000073803	341	262	185	336	243	270	143	244	233	168	313	283
ENSG00000073849	4	25	17	5	21	16	8	7	6	6	10	5
ENSG00000073910	30	7	16	18	23	25	13	21	24	15	34	15
ENSG00000073921	169	117	162	215	178	147	96	135	117	149	217	152
ENSG00000073969	70	62	64	67	41	62	28	29	52	33	43	43
ENSG00000074047	85	37	56	122	78	44	42	45	43	85	65	47
ENSG00000074054	241	173	165	225	217	171	106	161	186	161	237	203
ENSG00000074071	256	338	309	325	358	320	185	213	230	230	339	349
ENSG00000074181	202	193	133	208	207	172	160	168	224	173	217	194
ENSG00000074201	323	258	296	315	410	305	228	218	241	318	465	344
ENSG00000074219	365	305	229	437	364	300	241	318	339	219	395	345
ENSG00000074266	70	68	81	124	112	63	33	35	48	74	88	83
ENSG00000074319	145	99	91	118	149	127	93	107	113	99	150	146
ENSG00000074356	383	250	146	325	200	247	170	270	264	198	276	261
ENSG00000074410	78	74	61	67	118	76	103	155	159	41	121	93
ENSG00000074416	23	16	6	17	31	13	3	13	7	4	24	36
ENSG00000074527	4	0	0	0	0	0	3	7	1	1	0	5
ENSG00000074582	45	40	19	44	34	36	13	26	45	31	48	55
ENSG00000074590	157	98	53	284	126	99	41	71	104	122	182	139
ENSG00000074603	129	93	52	128	92	100	47	90	119	97	132	136
ENSG00000074621	50	38	33	66	15	30	30	66	48	15	30	28
ENSG00000074657	495	246	177	354	216	230	158	330	355	155	239	222
ENSG00000074695	784	500	363	1061	433	444	333	472	512	400	583	501
ENSG00000074696	801	872	942	889	1201	910	519	564	676	787	1090	985
ENSG00000074755	75	30	38	68	60	77	38	68	93	72	92	89
ENSG00000074800	1253	823	777	2071	1203	1001	691	683	841	1256	1409	1291
ENSG00000074842	175	147	136	286	170	128	107	86	93	127	242	167
ENSG00000074855	235	148	138	440	111	136	123	169	208	188	170	156
ENSG00000074935	47	36	27	30	40	39	16	44	40	28	23	22
ENSG00000074964	189	134	132	287	104	114	162	146	191	178	168	149
ENSG00000075035	5	19	12	7	4	4	2	3	6	2	1	1
ENSG00000075043	276	778	876	271	962	700	183	345	414	235	892	711
ENSG00000075089	70	56	49	71	49	48	36	58	55	37	88	71
ENSG00000075131	29	29	28	48	30	17	13	24	26	29	20	27
ENSG00000075142	443	336	426	432	666	365	335	287	369	494	688	507
ENSG00000075151	975	753	640	789	562	647	459	814	982	481	749	676
ENSG00000075188	32	21	24	39	29	26	21	15	31	31	33	36
ENSG00000075213	1145	403	359	1718	471	547	498	503	528	770	750	799
ENSG00000075218	196	161	96	351	125	126	129	132	172	192	210	141
ENSG00000075223	10	4	1	21	5	5	4	2	2	8	14	4
ENSG00000075234	28	40	20	36	35	19	19	37	43	14	45	35
ENSG00000075239	52	65	64	63	73	56	29	35	48	58	63	66
ENSG00000075240	10	8	9	4	12	9	3	3	5	3	6	1
ENSG00000075275	45	31	30	78	58	32	27	48	32	52	46	46
ENSG00000075292	639	415	351	536	384	414	255	436	566	356	464	445
ENSG00000075303	18	9	9	17	19	16	4	11	12	24	13	22
ENSG00000075336	153	85	83	151	90	99	39	91	62	87	87	86
ENSG00000075340	82	109	85	93	128	145	68	165	178	48	152	166
ENSG00000075391	97	79	63	107	99	109	74	105	105	85	80	120
ENSG00000075399	63	46	29	55	47	56	46	63	65	44	55	83
ENSG00000075407	209	181	145	307	112	180	104	161	199	134	111	144
ENSG00000075413	301	226	168	328	238	230	203	310	344	221	365	299
ENSG00000075415	510	328	393	505	571	366	333	257	420	449	746	461
ENSG00000075420	335	205	234	281	212	230	169	208	285	176	289	271
ENSG00000075426	16	11	8	41	5	3	3	15	11	22	16	17
ENSG00000075461	281	190	160	299	289	269	142	169	176	206	311	277
ENSG00000075539	272	178	142	276	160	207	122	271	265	204	314	245
ENSG00000075568	284	212	232	206	277	211	154	197	266	162	265	231
ENSG00000075618	864	809	612	999	664	626	450	613	726	565	867	864
ENSG00000075624	5801	3599	2724	6534	3523	3762	1573	2726	3235	2409	4594	3830
ENSG00000075651	16	5	7	15	8	11	13	7	16	5	14	9
ENSG00000075702	24	8	27	21	20	11	9	8	15	15	14	18
ENSG00000075711	256	143	138	289	153	136	128	159	176	240	189	149
ENSG00000075785	436	335	422	418	376	366	201	370	361	234	458	394
ENSG00000075790	216	147	127	212	143	184	106	126	170	130	182	170
ENSG00000075826	62	50	33	63	41	49	41	84	67	34	63	44
ENSG00000075856	301	215	181	332	174	207	131	202	238	202	249	244
ENSG00000075914	61	47	46	72	91	48	43	56	55	41	79	60
ENSG00000075945	68	27	56	50	53	38	49	53	93	48	58	61
ENSG00000075975	28	20	27	30	27	24	23	15	38	42	49	21
ENSG00000076003	95	88	110	172	132	117	48	44	52	111	136	144
ENSG00000076043	93	89	80	99	130	93	51	57	53	59	122	124
ENSG00000076053	21	15	23	9	16	18	14	11	17	15	21	22
ENSG00000076067	43	33	34	53	48	41	14	44	44	35	44	48
ENSG00000076108	610	310	264	456	254	334	270	397	452	249	384	431
ENSG00000076201	208	147	164	188	163	160	124	147	172	116	193	164
ENSG00000076242	70	55	78	90	86	87	46	43	48	75	64	51
ENSG00000076248	159	156	116	209	128	151	49	71	84	103	133	130
ENSG00000076321	68	69	69	97	147	58	62	76	90	73	99	99
ENSG00000076344	1	3	4	0	4	0	0	3	5	4	12	1
ENSG00000076351	6	0	2	11	1	4	2	1	0	8	8	5
ENSG00000076356	123	120	89	163	125	161	67	127	135	149	228	287
ENSG00000076382	93	50	66	122	40	50	35	24	37	72	82	77
ENSG00000076513	49	34	19	60	40	42	22	49	76	55	48	51
ENSG00000076554	19	20	11	31	9	13	12	12	18	9	12	6
ENSG00000076555	25	15	9	35	12	13	18	19	20	13	8	22
ENSG00000076604	373	345	375	324	302	254	386	240	296	275	278	269
ENSG00000076641	163	110	117	182	229	192	65	131	145	86	210	224
ENSG00000076650	100	92	83	128	56	62	33	103	85	73	93	68
ENSG00000076662	4	3	0	5	9	4	1	3	6	2	8	2
ENSG00000076685	123	67	74	107	44	71	35	99	110	71	93	105
ENSG00000076706	232	135	91	407	113	134	164	216	209	151	241	207
ENSG00000076716	185	104	89	197	165	137	115	118	120	162	191	192
ENSG00000076770	1	1	7	1	11	8	0	3	6	4	3	1
ENSG00000076826	1	2	0	1	0	0	0	0	1	1	4	0
ENSG00000076864	9	11	15	10	7	8	6	8	16	6	11	14
ENSG00000076924	8	4	2	6	8	9	2	3	10	3	3	7
ENSG00000076928	55	30	14	24	20	23	25	8	42	21	38	33
ENSG00000076984	256	143	100	246	131	183	112	144	163	103	178	207
ENSG00000077044	190	107	66	145	113	59	67	78	107	61	106	98
ENSG00000077080	1	6	4	1	2	2	1	1	4	0	2	1
ENSG00000077092	1	0	0	0	2	4	0	0	0	1	5	0
ENSG00000077097	602	430	368	464	464	391	337	396	451	370	517	460
ENSG00000077147	1084	691	542	870	719	630	569	681	820	608	815	721
ENSG00000077150	59	49	23	70	28	43	34	55	62	33	45	51
ENSG00000077152	56	55	88	72	78	49	33	10	24	116	73	37
ENSG00000077157	163	121	75	126	97	130	67	168	148	88	142	105
ENSG00000077232	440	257	245	395	293	264	166	268	275	231	404	360
ENSG00000077235	364	231	219	254	209	240	191	269	295	205	338	267
ENSG00000077238	6	4	2	3	1	0	0	3	1	0	8	5
ENSG00000077254	341	223	181	235	193	229	107	242	283	171	239	250
ENSG00000077264	253	250	214	245	297	283	147	352	455	168	522	429
ENSG00000077279	98	218	209	104	282	214	99	275	438	77	409	315
ENSG00000077312	289	179	156	307	169	199	101	183	169	125	187	223
ENSG00000077348	18	32	14	41	41	34	9	19	13	30	38	47
ENSG00000077380	2090	1350	907	3072	812	835	1204	1621	1916	1103	1612	1232
ENSG00000077454	78	70	41	79	58	54	56	67	91	58	98	76
ENSG00000077458	108	90	71	156	79	67	76	85	132	138	152	105
ENSG00000077463	90	60	48	80	34	55	35	39	63	38	56	73
ENSG00000077514	108	112	68	239	108	100	44	82	104	122	118	116
ENSG00000077522	18	20	17	20	11	12	14	18	34	9	23	28
ENSG00000077549	1051	905	997	1218	1715	919	735	530	671	1140	1536	1113
ENSG00000077585	45	50	66	20	57	35	25	45	40	8	82	48
ENSG00000077684	135	122	96	173	132	101	99	118	146	157	233	180
ENSG00000077721	58	47	45	75	89	47	38	27	49	76	66	72
ENSG00000077782	1365	1163	1079	1019	1048	1028	687	964	1254	609	1082	1080
ENSG00000077942	214	161	132	192	193	216	109	167	167	99	211	183
ENSG00000077943	1	6	11	0	1	2	0	5	4	0	3	5
ENSG00000078018	4298	4085	3402	4096	3921	4405	2471	4459	5062	2462	5110	5058
ENSG00000078043	164	123	101	202	183	146	73	178	199	142	166	175
ENSG00000078053	54	45	83	72	71	68	17	51	51	40	63	43
ENSG00000078061	83	57	54	66	62	51	30	46	44	64	74	52
ENSG00000078070	59	48	40	56	43	63	32	36	43	40	54	46
ENSG00000078114	14	3	4	51	15	10	4	7	5	31	25	17
ENSG00000078124	54	47	33	71	54	42	33	49	57	64	55	60
ENSG00000078140	546	321	240	381	312	267	185	281	317	244	365	293
ENSG00000078142	190	130	98	147	92	106	82	124	189	127	207	165
ENSG00000078177	102	72	56	121	81	80	39	95	97	103	89	104
ENSG00000078237	88	54	85	69	80	87	33	60	82	55	79	36
ENSG00000078246	241	140	120	218	123	137	92	150	181	110	201	217
ENSG00000078269	750	372	305	606	165	211	481	284	372	353	281	261
ENSG00000078295	91	55	74	110	70	80	59	61	68	48	106	111
ENSG00000078304	455	313	282	438	294	327	212	306	327	199	353	386
ENSG00000078328	8	0	1	2	4	1	2	1	0	3	0	0
ENSG00000078369	1463	1081	1017	1404	1093	1075	744	1167	1181	901	1521	1459
ENSG00000078401	2	0	0	16	0	0	0	0	4	15	1	0
ENSG00000078403	98	64	55	169	82	91	65	100	108	42	94	90
ENSG00000078487	61	39	24	38	13	38	22	58	58	18	28	31
ENSG00000078549	77	98	81	94	123	148	86	120	137	39	118	138
ENSG00000078618	803	337	277	586	234	284	234	343	445	240	380	363
ENSG00000078668	201	162	166	314	196	188	125	145	197	167	282	194
ENSG00000078674	1246	934	689	1425	698	768	681	876	1033	768	1044	1010
ENSG00000078687	219	233	214	233	256	241	148	200	263	196	278	230
ENSG00000078699	169	98	104	172	220	191	112	170	211	142	302	240
ENSG00000078725	1	2	0	2	0	1	0	1	0	0	1	4
ENSG00000078747	103	70	53	60	34	79	59	54	69	77	74	90
ENSG00000078804	68	36	33	37	52	21	26	34	55	55	80	66
ENSG00000078808	676	633	593	572	745	656	342	502	516	463	795	773
ENSG00000078814	2	1	0	0	0	0	4	4	5	5	7	2
ENSG00000078900	16	8	7	43	25	25	4	14	3	39	31	39
ENSG00000078902	188	122	101	183	169	133	132	155	170	132	241	203
ENSG00000078967	47	28	38	37	59	32	12	41	38	26	47	29
ENSG00000079102	81	61	51	120	68	57	26	42	63	89	101	59
ENSG00000079134	135	114	91	117	99	70	70	82	101	120	149	87
ENSG00000079150	18	14	15	23	15	13	19	12	18	15	31	23
ENSG00000079156	187	104	107	221	117	157	96	115	124	151	135	171
ENSG00000079215	2450	2039	2135	1122	1404	1711	968	1524	2101	613	1846	1833
ENSG00000079246	1092	769	842	1446	917	889	566	689	826	1128	1076	931
ENSG00000079263	1	1	0	0	0	0	0	0	3	3	5	3
ENSG00000079277	38	28	11	44	26	27	22	27	28	24	32	27
ENSG00000079308	138	120	143	84	71	116	84	138	180	40	80	107
ENSG00000079313	55	31	20	18	6	9	27	30	25	12	21	35
ENSG00000079332	170	131	138	213	168	138	87	118	126	111	191	164
ENSG00000079335	14	16	11	7	13	13	8	15	15	4	14	11
ENSG00000079337	5	8	4	2	6	4	2	1	4	3	3	7
ENSG00000079387	113	62	77	151	84	123	44	123	87	76	144	91
ENSG00000079432	243	113	96	196	61	84	74	133	186	110	165	164
ENSG00000079435	33	34	41	49	12	22	22	21	23	20	40	42
ENSG00000079459	2131	646	707	1259	529	615	606	542	701	751	867	705
ENSG00000079462	584	417	407	598	486	402	208	355	423	297	509	430
ENSG00000079482	44	50	33	58	36	59	26	89	97	32	45	49
ENSG00000079616	181	147	130	234	153	125	97	87	110	155	195	197
ENSG00000079691	81	107	82	82	62	66	39	80	114	49	85	51
ENSG00000079739	65	35	25	46	44	41	19	26	45	53	60	35
ENSG00000079785	1035	593	503	973	418	504	534	534	633	574	762	606
ENSG00000079805	234	191	134	297	157	196	128	214	210	119	239	245
ENSG00000079819	544	363	341	649	300	344	299	322	388	343	525	421
ENSG00000079931	108	62	85	97	136	100	51	106	102	60	154	138
ENSG00000079950	83	86	74	72	87	67	54	84	88	32	65	49
ENSG00000079974	313	227	169	342	169	226	127	192	209	142	193	232
ENSG00000079999	152	123	119	147	153	102	59	101	91	92	171	129
ENSG00000080189	121	84	56	95	67	56	83	74	72	66	113	99
ENSG00000080200	85	43	47	69	56	61	20	68	61	42	77	53
ENSG00000080298	429	328	311	354	324	415	246	381	496	262	408	389
ENSG00000080345	596	467	374	834	434	458	295	423	539	438	577	621
ENSG00000080371	148	97	98	151	138	96	45	93	105	85	146	141
ENSG00000080493	227	323	245	86	200	260	122	324	416	41	240	189
ENSG00000080503	554	410	375	532	308	375	268	446	557	241	388	355
ENSG00000080546	52	45	45	58	69	72	37	59	70	81	78	78
ENSG00000080573	29	5	4	54	2	5	7	0	5	19	8	16
ENSG00000080603	13	10	3	15	8	4	5	9	9	14	11	18
ENSG00000080608	436	340	290	657	318	336	191	277	307	286	348	360
ENSG00000080644	10	1	0	2	0	1	1	0	1	2	4	1
ENSG00000080709	0	1	0	0	2	3	1	1	6	1	1	5
ENSG00000080802	103	105	121	115	113	114	77	110	123	79	160	141
ENSG00000080815	139	111	115	139	153	125	85	169	154	122	202	202
ENSG00000080819	28	26	18	25	26	17	11	15	15	27	30	40
ENSG00000080822	54	53	79	32	113	54	34	43	37	50	68	90
ENSG00000080823	144	135	88	190	82	102	96	135	122	91	103	117
ENSG00000080824	8167	4769	4786	12587	3076	3935	3139	3518	4201	4233	4295	3898
ENSG00000080839	83	46	41	145	65	63	34	48	49	87	77	55
ENSG00000080845	264	211	173	311	197	225	118	225	227	132	280	220
ENSG00000080986	164	94	96	289	63	100	67	63	98	138	130	130
ENSG00000081014	26	39	22	28	26	31	15	9	22	22	26	34
ENSG00000081019	138	148	145	159	176	183	106	135	147	173	221	218
ENSG00000081026	103	55	38	126	64	57	45	60	73	94	75	37
ENSG00000081041	1	0	2	0	4	1	0	0	0	1	4	1
ENSG00000081059	17	9	6	10	8	8	1	8	7	8	11	7
ENSG00000081087	97	75	77	68	65	74	36	68	84	26	89	92
ENSG00000081138	36	57	35	36	72	66	19	62	48	31	103	105
ENSG00000081148	3	2	0	3	0	1	2	1	4	5	0	2
ENSG00000081154	230	156	172	215	175	200	124	117	153	162	227	224
ENSG00000081177	32	10	15	34	19	20	12	27	26	16	19	25
ENSG00000081181	2	0	1	2	1	0	2	1	1	0	3	1
ENSG00000081189	33	46	33	39	36	55	23	56	71	43	96	119
ENSG00000081307	89	88	67	81	54	86	64	64	83	65	92	90
ENSG00000081320	24	23	30	22	41	33	4	25	15	23	37	28
ENSG00000081377	40	26	35	35	23	34	17	29	22	39	37	22
ENSG00000081386	31	26	31	27	25	25	17	11	36	17	27	31
ENSG00000081479	46	46	53	76	51	66	55	62	71	28	37	47
ENSG00000081665	24	9	13	6	16	16	11	14	19	7	17	11
ENSG00000081692	55	41	38	41	64	58	29	31	37	38	69	74
ENSG00000081721	30	26	28	36	29	20	32	28	29	41	43	26
ENSG00000081760	105	46	32	138	68	51	54	71	76	82	58	75
ENSG00000081791	130	88	66	137	49	56	67	98	113	62	80	56
ENSG00000081803	61	39	30	55	41	36	25	27	48	32	48	50
ENSG00000081818	2	0	2	1	4	1	1	0	4	3	0	3
ENSG00000081842	3	0	0	0	2	2	0	1	1	0	1	0
ENSG00000081853	2	3	1	0	1	0	0	1	2	0	0	0
ENSG00000081870	37	59	56	82	81	55	30	21	35	93	76	61
ENSG00000081913	989	529	440	684	368	514	509	681	774	355	560	472
ENSG00000081923	2	0	0	0	6	0	0	2	1	0	0	0
ENSG00000082014	243	288	246	311	230	301	122	254	256	150	322	260
ENSG00000082068	141	129	123	188	87	162	100	167	152	91	175	179
ENSG00000082126	1	0	0	5	1	0	2	1	0	4	5	1
ENSG00000082146	46	32	38	35	48	28	27	23	29	38	43	24
ENSG00000082153	628	421	345	558	327	373	221	409	400	321	525	506
ENSG00000082196	9	2	5	2	0	4	6	2	7	0	0	4
ENSG00000082212	124	103	106	106	82	102	52	84	69	60	105	113
ENSG00000082213	32	27	15	22	28	19	17	25	19	13	56	40
ENSG00000082258	126	83	87	105	124	89	58	109	160	65	130	109
ENSG00000082269	91	85	53	122	62	96	38	86	96	56	89	85
ENSG00000082397	63	29	27	55	23	25	33	39	34	18	43	41
ENSG00000082438	26	16	8	36	21	18	9	6	9	15	21	19
ENSG00000082458	99	56	36	117	58	62	45	58	54	56	56	51
ENSG00000082482	1	0	0	2	0	2	0	4	0	3	1	0
ENSG00000082497	15	19	17	43	22	27	10	25	10	26	36	25
ENSG00000082512	5	5	2	7	4	1	1	1	5	2	9	4
ENSG00000082515	77	71	55	105	77	74	55	56	71	81	126	100
ENSG00000082516	79	64	74	106	39	71	23	58	68	36	76	83
ENSG00000082556	3	1	5	1	0	1	2	2	3	0	4	3
ENSG00000082641	243	163	153	252	201	121	133	136	177	155	218	229
ENSG00000082684	178	111	80	257	85	128	91	150	191	92	199	149
ENSG00000082701	500	302	275	387	328	310	256	382	432	309	452	425
ENSG00000082781	1975	1309	1109	1706	1160	978	1031	965	1146	730	1701	1450
ENSG00000082805	424	261	215	540	160	219	186	381	414	212	266	262
ENSG00000082898	332	281	231	388	219	232	166	179	240	165	276	258
ENSG00000082996	116	79	81	94	98	70	52	74	102	68	114	98
ENSG00000083067	10	3	0	6	2	7	4	3	8	8	3	2
ENSG00000083093	29	23	30	26	27	35	11	13	22	26	39	33
ENSG00000083097	45	45	23	59	51	60	28	38	62	57	76	59
ENSG00000083099	564	277	241	698	246	228	216	321	359	302	449	350
ENSG00000083123	10	19	22	9	15	5	3	6	10	2	20	5
ENSG00000083168	1131	736	646	1239	671	716	575	890	966	671	1020	840
ENSG00000083223	215	136	105	237	111	156	150	165	210	88	182	158
ENSG00000083290	29	31	13	45	37	26	22	24	35	25	58	39
ENSG00000083312	1603	969	848	1366	782	1103	746	1026	1187	630	874	1066
ENSG00000083444	383	200	158	346	221	191	125	170	188	197	254	258
ENSG00000083457	42	23	38	53	58	32	28	36	27	36	70	41
ENSG00000083520	165	176	104	191	100	132	101	186	189	146	213	165
ENSG00000083535	79	66	45	49	45	77	29	55	71	34	59	77
ENSG00000083544	82	39	27	53	48	40	29	47	55	31	46	41
ENSG00000083635	54	66	74	80	70	64	52	43	71	42	90	74
ENSG00000083642	1116	766	830	1216	524	788	524	731	1140	592	709	707
ENSG00000083720	50	32	42	66	56	26	21	24	50	44	42	46
ENSG00000083750	27	26	14	14	13	20	5	21	29	15	27	34
ENSG00000083799	49	53	39	55	47	44	31	61	52	76	61	66
ENSG00000083807	31	24	30	29	24	16	9	28	23	8	28	37
ENSG00000083812	51	34	19	40	20	33	26	38	28	41	44	31
ENSG00000083814	23	14	21	12	1	15	10	17	21	6	8	12
ENSG00000083817	6	9	9	6	3	3	4	6	10	6	6	6
ENSG00000083828	11	6	3	13	7	9	7	14	10	0	6	7
ENSG00000083838	47	25	25	43	41	38	33	40	39	50	58	53
ENSG00000083844	99	83	76	89	63	85	48	85	117	41	69	104
ENSG00000083845	1877	1194	1245	2065	1639	1433	758	1255	1511	1149	1874	1671
ENSG00000083857	299	251	192	249	255	277	133	262	294	218	348	379
ENSG00000083896	691	478	381	736	346	420	355	489	588	378	528	505
ENSG00000083937	83	65	37	67	59	64	40	54	70	56	95	62
ENSG00000084070	82	79	66	126	98	85	56	79	65	74	122	94
ENSG00000084072	113	88	105	107	106	88	65	93	102	41	95	83
ENSG00000084073	116	53	62	96	70	73	43	87	81	51	72	99
ENSG00000084090	699	596	501	974	573	540	432	488	494	637	850	686
ENSG00000084092	43	20	24	41	24	20	23	18	39	16	32	32
ENSG00000084093	330	271	238	362	187	259	168	305	400	225	269	276
ENSG00000084112	97	66	40	78	37	64	41	47	60	42	55	47
ENSG00000084207	3064	2270	1722	3798	2256	2134	1661	1994	1934	1627	2721	2429
ENSG00000084234	5511	4134	2899	5402	4187	3706	3138	4115	4500	3399	6545	5347
ENSG00000084444	20	36	29	27	30	39	9	14	17	8	22	42
ENSG00000084453	2	5	20	1	6	5	3	32	21	1	7	12
ENSG00000084463	483	246	220	469	249	248	201	252	360	332	452	337
ENSG00000084623	302	154	184	447	206	219	135	226	230	202	240	238
ENSG00000084628	81	42	20	71	22	25	39	53	76	37	34	36
ENSG00000084636	4	4	9	1	6	5	4	3	9	3	10	9
ENSG00000084652	223	138	124	213	146	133	122	189	151	129	158	143
ENSG00000084676	244	179	162	227	198	193	111	215	270	193	326	333
ENSG00000084693	103	95	66	88	84	73	48	78	127	32	95	96
ENSG00000084710	208	113	99	283	82	89	125	108	153	175	116	81
ENSG00000084731	106	68	59	65	68	50	25	62	77	47	60	70
ENSG00000084733	553	499	434	499	332	371	286	425	519	285	372	391
ENSG00000084754	1098	515	470	857	521	568	453	617	723	498	702	628
ENSG00000084764	30	31	43	51	22	42	24	37	35	25	29	57
ENSG00000084774	86	55	58	114	67	59	30	69	75	54	75	76
ENSG00000085063	117	122	108	226	187	121	51	98	108	103	201	175
ENSG00000085117	7	0	2	1	3	1	0	0	1	1	2	2
ENSG00000085185	64	47	36	64	21	44	33	49	76	38	61	46
ENSG00000085224	2369	1600	1578	2258	1284	1521	1373	1775	2211	1208	1888	1711
ENSG00000085231	46	42	34	84	37	36	25	26	33	46	51	48
ENSG00000085274	18	27	10	29	22	30	13	15	36	25	31	22
ENSG00000085365	165	147	141	123	125	148	89	125	141	92	154	145
ENSG00000085377	45	39	34	58	36	33	30	33	25	43	54	58
ENSG00000085382	23	20	6	13	8	19	2	7	13	12	21	18
ENSG00000085415	42	34	53	57	59	23	19	29	30	32	53	44
ENSG00000085433	79	67	69	88	70	63	48	74	81	46	61	91
ENSG00000085449	70	77	60	72	62	99	64	74	62	58	93	105
ENSG00000085465	0	0	4	4	0	0	1	1	0	1	5	0
ENSG00000085491	69	29	28	71	24	41	27	37	43	35	39	58
ENSG00000085511	131	95	67	189	89	87	72	85	88	103	123	88
ENSG00000085514	3	0	1	3	2	7	5	4	4	1	10	1
ENSG00000085552	45	19	10	39	14	23	9	29	39	29	28	12
ENSG00000085563	5	0	0	6	0	0	0	4	2	0	2	3
ENSG00000085644	34	22	19	36	22	12	14	23	39	17	29	28
ENSG00000085662	198	124	183	197	281	188	150	127	135	173	231	230
ENSG00000085719	134	93	80	98	95	93	99	95	123	62	126	95
ENSG00000085721	89	47	51	86	46	38	35	55	54	50	67	60
ENSG00000085733	325	317	312	337	369	289	265	291	291	360	468	321
ENSG00000085760	164	133	93	231	74	100	79	124	163	100	136	177
ENSG00000085788	36	28	22	36	24	13	13	26	41	29	27	34
ENSG00000085832	122	70	60	101	80	75	45	78	89	59	97	73
ENSG00000085840	11	15	9	27	11	4	11	2	8	23	11	9
ENSG00000085871	38	24	32	44	51	23	30	23	40	38	44	39
ENSG00000085872	145	155	115	159	80	136	84	124	134	103	152	157
ENSG00000085978	34	36	22	53	31	32	15	39	31	44	38	34
ENSG00000085982	246	200	154	190	158	185	143	226	237	83	187	167
ENSG00000085998	94	56	65	79	113	78	41	55	93	55	112	104
ENSG00000085999	14	17	24	22	25	18	0	4	5	25	28	23
ENSG00000086015	108	73	47	120	69	59	48	71	71	56	91	85
ENSG00000086061	580	349	396	832	348	404	285	366	444	405	486	323
ENSG00000086062	35	52	46	121	66	29	32	41	34	91	67	49
ENSG00000086065	108	122	160	132	177	126	79	84	134	149	194	117
ENSG00000086102	104	60	61	155	87	91	76	98	78	98	118	114
ENSG00000086189	19	28	23	32	29	33	24	23	32	16	30	19
ENSG00000086200	35	25	29	35	14	38	11	12	33	16	31	20
ENSG00000086232	485	323	303	448	326	300	273	294	358	395	540	357
ENSG00000086289	78	44	40	79	63	47	24	27	34	42	36	36
ENSG00000086300	10	29	21	8	20	32	4	11	18	2	54	26
ENSG00000086475	139	124	123	185	183	154	78	131	153	148	196	165
ENSG00000086504	63	52	72	51	47	60	58	41	49	45	62	62
ENSG00000086544	26	12	31	30	21	12	18	23	22	19	22	16
ENSG00000086589	349	264	247	344	227	278	174	274	260	238	313	333
ENSG00000086598	246	129	160	209	200	132	112	123	144	132	200	187
ENSG00000086619	27	34	22	19	10	19	24	17	28	9	21	20
ENSG00000086666	352	249	196	346	277	297	192	227	328	270	399	340
ENSG00000086712	100	48	55	103	53	53	60	53	77	48	106	81
ENSG00000086730	7	1	0	5	2	3	1	1	6	6	2	5
ENSG00000086758	926	561	408	777	328	532	348	645	843	312	566	570
ENSG00000086827	43	54	23	91	49	28	47	42	22	49	72	50
ENSG00000086848	30	20	8	24	18	21	21	24	31	31	30	12
ENSG00000086991	2	2	0	1	1	0	2	0	1	2	2	0
ENSG00000087008	78	73	41	74	45	56	35	67	59	40	69	77
ENSG00000087053	279	220	188	374	325	258	139	216	235	232	360	318
ENSG00000087074	83	75	49	80	67	56	65	59	44	121	131	97
ENSG00000087076	3	5	5	7	4	13	2	0	6	3	2	5
ENSG00000087077	69	61	64	71	76	43	23	67	63	35	57	46
ENSG00000087085	5	22	15	11	21	8	6	14	16	12	16	22
ENSG00000087086	1126	829	650	1050	1517	1054	465	887	881	814	1631	1334
ENSG00000087087	932	605	416	1272	327	442	466	653	689	477	539	548
ENSG00000087088	210	106	74	165	89	104	45	139	142	59	134	146
ENSG00000087095	67	42	40	67	40	39	32	43	56	39	72	68
ENSG00000087111	157	121	92	225	120	113	82	116	166	96	154	129
ENSG00000087152	183	150	102	203	124	129	114	162	167	126	147	142
ENSG00000087157	29	28	23	34	37	21	17	23	39	32	54	25
ENSG00000087191	574	389	266	703	302	306	365	382	523	378	518	409
ENSG00000087206	193	100	104	168	83	103	93	136	195	99	152	120
ENSG00000087245	236	108	69	201	95	112	71	66	94	140	159	136
ENSG00000087250	62	125	57	53	129	86	50	102	132	26	194	131
ENSG00000087253	91	44	55	100	102	64	11	26	31	35	85	56
ENSG00000087258	261	273	176	283	211	237	171	337	375	115	274	236
ENSG00000087263	450	305	197	456	252	305	159	271	274	207	248	355
ENSG00000087266	50	28	36	79	34	27	49	53	62	56	33	28
ENSG00000087269	254	157	131	352	130	197	122	179	201	203	193	207
ENSG00000087274	568	463	504	371	498	372	357	331	436	359	593	430
ENSG00000087299	33	22	15	50	15	15	23	37	38	27	37	30
ENSG00000087301	125	79	50	79	74	73	44	63	74	65	89	84
ENSG00000087302	289	182	220	317	263	192	138	160	223	209	294	231
ENSG00000087303	9	3	1	17	0	0	2	5	2	7	0	1
ENSG00000087338	78	77	46	105	122	99	59	103	84	98	107	110
ENSG00000087365	1812	1198	816	1841	867	1092	788	1379	1355	887	1483	1372
ENSG00000087448	359	237	223	508	204	193	211	215	289	225	196	190
ENSG00000087460	1477	1093	1370	1341	1422	1251	756	883	1291	972	1810	1568
ENSG00000087470	285	187	180	356	156	153	174	233	271	160	286	305
ENSG00000087494	3	2	5	3	4	2	3	4	2	9	15	5
ENSG00000087502	148	132	148	168	170	96	76	96	154	125	156	171
ENSG00000087510	16	7	8	50	11	6	9	12	16	43	8	14
ENSG00000087586	208	139	147	359	120	144	73	145	205	175	153	174
ENSG00000087842	55	53	46	47	53	48	27	27	40	34	66	71
ENSG00000087884	216	188	134	230	110	160	171	174	174	111	184	125
ENSG00000087903	47	55	39	82	54	39	36	43	64	36	55	82
ENSG00000087995	90	75	80	167	57	43	61	84	79	83	72	80
ENSG00000088035	11	8	11	14	13	5	3	8	6	3	12	7
ENSG00000088038	102	73	54	99	63	63	42	58	73	38	74	40
ENSG00000088179	109	84	83	91	82	95	51	59	120	46	84	70
ENSG00000088205	453	345	276	663	266	271	236	268	322	287	346	340
ENSG00000088247	2937	2070	1736	3061	1699	2261	1227	1901	1855	1330	2530	2490
ENSG00000088256	477	277	297	414	309	281	129	295	292	199	386	387
ENSG00000088280	70	28	30	48	29	25	43	39	44	35	26	20
ENSG00000088298	19	8	6	12	16	8	7	9	7	7	17	12
ENSG00000088305	43	42	32	43	26	41	29	49	63	24	39	47
ENSG00000088325	756	499	381	923	345	393	262	343	419	407	465	441
ENSG00000088356	134	137	91	193	126	108	71	112	109	95	185	183
ENSG00000088367	49	57	35	73	58	59	14	57	53	28	54	78
ENSG00000088387	34	31	28	6	17	21	11	19	27	6	11	20
ENSG00000088448	126	90	88	160	91	105	106	100	113	129	129	120
ENSG00000088451	5	4	1	3	4	5	2	2	11	3	9	4
ENSG00000088538	1	3	4	2	0	0	3	3	2	2	0	1
ENSG00000088543	7	11	1	1	6	3	1	7	5	1	3	3
ENSG00000088682	71	52	64	81	56	57	29	39	68	52	61	78
ENSG00000088727	39	22	34	52	31	40	47	19	30	55	36	42
ENSG00000088766	39	34	54	48	86	61	38	44	50	63	83	69
ENSG00000088808	19	8	8	18	0	4	3	3	9	5	1	8
ENSG00000088812	90	54	51	96	61	46	53	75	92	63	85	66
ENSG00000088826	88	64	65	107	63	66	60	78	88	92	169	105
ENSG00000088832	593	454	447	714	484	539	287	385	417	338	597	554
ENSG00000088833	273	162	204	261	205	219	112	190	175	132	233	228
ENSG00000088836	7	9	6	23	39	17	17	9	20	9	13	15
ENSG00000088854	84	80	66	55	73	59	50	76	132	65	107	89
ENSG00000088876	8	18	8	28	13	22	11	18	25	10	13	19
ENSG00000088881	59	36	30	36	59	47	26	67	51	59	62	67
ENSG00000088882	64	66	33	46	40	68	38	77	64	34	57	80
ENSG00000088888	322	201	178	349	196	182	185	270	325	155	239	226
ENSG00000088899	55	43	26	38	25	47	19	68	62	22	44	48
ENSG00000088930	652	393	290	827	256	352	363	529	530	387	428	434
ENSG00000088970	17	4	3	21	6	7	10	14	20	5	3	14
ENSG00000088986	889	754	854	827	840	832	459	421	475	425	707	673
ENSG00000088992	252	115	76	497	323	255	97	134	123	262	403	319
ENSG00000089006	484	359	316	538	403	399	250	337	406	272	410	423
ENSG00000089009	1151	940	1055	1392	1760	992	738	895	1089	1247	1878	1304
ENSG00000089022	147	88	101	149	104	91	57	123	107	114	133	110
ENSG00000089041	58	35	25	58	22	31	24	22	34	22	26	37
ENSG00000089048	422	341	358	564	328	372	255	292	433	287	344	401
ENSG00000089050	53	38	34	44	71	48	27	48	58	39	61	52
ENSG00000089053	305	179	127	325	206	210	122	208	243	202	258	257
ENSG00000089057	92	76	51	112	144	78	41	92	88	72	153	111
ENSG00000089060	4	2	2	9	8	5	2	8	7	3	11	6
ENSG00000089063	80	77	90	63	142	64	62	39	59	67	127	72
ENSG00000089091	29	15	10	29	33	24	38	25	36	28	16	38
ENSG00000089094	79	45	57	68	86	69	47	47	67	53	60	76
ENSG00000089123	11	7	5	12	16	7	7	5	15	10	12	12
ENSG00000089154	277	183	165	273	159	172	150	160	194	167	197	185
ENSG00000089157	3891	3127	2807	4912	3668	3194	2379	2777	3004	2942	4396	3833
ENSG00000089159	156	176	176	161	201	90	78	73	89	120	175	151
ENSG00000089163	2	4	0	0	3	0	0	0	0	1	4	2
ENSG00000089169	1	28	24	3	21	30	0	14	15	1	19	20
ENSG00000089177	74	36	25	70	15	29	40	53	47	24	28	37
ENSG00000089195	57	73	62	117	54	45	51	58	59	72	55	87
ENSG00000089199	31	20	23	15	24	13	43	41	53	15	34	37
ENSG00000089220	2449	1437	1316	2850	1328	1328	1327	1259	1706	1515	1970	1656
ENSG00000089234	56	47	38	66	35	43	32	53	55	42	64	60
ENSG00000089248	694	320	248	586	313	295	195	290	299	284	342	331
ENSG00000089280	1817	1509	1433	1946	1751	1716	1041	1434	1579	1306	2443	2157
ENSG00000089289	188	105	108	149	97	110	118	137	116	125	143	100
ENSG00000089327	1	5	1	2	6	3	0	1	5	0	5	7
ENSG00000089335	85	68	75	92	75	68	61	84	107	74	76	77
ENSG00000089351	252	225	162	150	143	172	129	188	205	98	151	157
ENSG00000089486	137	86	114	169	170	100	90	84	124	62	146	143
ENSG00000089597	1269	879	637	1103	882	968	630	745	731	772	1081	1071
ENSG00000089639	24	21	13	24	20	24	18	24	31	17	29	29
ENSG00000089682	80	71	57	97	44	68	51	61	101	61	87	84
ENSG00000089685	367	259	217	393	281	229	193	147	170	273	375	320
ENSG00000089692	2	4	5	1	10	2	7	0	0	4	1	2
ENSG00000089693	577	441	399	705	417	320	255	352	382	331	511	517
ENSG00000089723	13	9	27	10	25	27	10	16	20	7	13	30
ENSG00000089737	1060	704	550	988	653	808	581	885	961	630	893	1025
ENSG00000089775	23	27	24	31	26	32	9	38	43	19	20	18
ENSG00000089818	34	27	30	28	17	17	13	10	20	24	21	22
ENSG00000089820	4	4	2	9	2	3	4	11	7	1	4	9
ENSG00000089876	32	43	19	30	32	39	18	31	42	41	35	41
ENSG00000089902	452	240	202	479	124	193	200	234	334	176	258	244
ENSG00000089916	695	608	426	610	353	533	351	691	789	259	589	580
ENSG00000090006	14	21	13	14	12	10	7	21	38	6	15	19
ENSG00000090013	10	3	2	11	8	8	1	24	9	0	8	15
ENSG00000090020	39	18	22	62	29	24	11	16	20	19	36	26
ENSG00000090054	38	27	19	41	34	37	22	23	19	22	22	23
ENSG00000090060	567	390	334	432	382	352	222	375	393	324	484	430
ENSG00000090061	124	133	78	126	101	102	43	85	132	92	162	129
ENSG00000090097	1696	1380	949	1737	1002	1701	643	1361	1391	936	1676	1939
ENSG00000090238	70	53	59	76	43	71	40	61	61	23	52	78
ENSG00000090263	264	175	129	211	160	169	134	142	170	118	213	156
ENSG00000090266	414	348	290	591	402	289	246	244	321	364	486	355
ENSG00000090273	277	198	201	331	231	196	131	170	187	168	206	184
ENSG00000090316	147	84	74	158	85	71	69	73	95	111	113	87
ENSG00000090372	118	116	121	119	136	116	56	114	108	66	146	131
ENSG00000090432	94	56	39	64	68	48	29	79	70	36	84	71
ENSG00000090447	19	18	6	21	22	16	6	10	12	11	28	20
ENSG00000090470	157	107	119	163	147	87	79	118	123	101	167	111
ENSG00000090487	107	82	93	99	158	119	58	80	101	82	177	106
ENSG00000090520	241	201	130	339	128	146	123	125	149	135	141	142
ENSG00000090530	14	13	1	27	10	11	5	2	2	12	31	23
ENSG00000090539	2	2	5	4	7	7	2	2	3	1	9	8
ENSG00000090565	123	68	56	139	78	104	55	120	113	65	114	94
ENSG00000090581	68	82	109	86	84	82	64	83	90	87	99	104
ENSG00000090612	44	45	42	42	35	39	30	41	51	34	41	45
ENSG00000090615	281	230	228	267	252	193	194	160	206	212	312	277
ENSG00000090621	573	485	450	662	500	511	263	357	345	432	553	591
ENSG00000090661	18	13	11	6	13	14	11	14	11	8	12	8
ENSG00000090674	8	17	5	8	7	12	17	7	9	12	11	14
ENSG00000090686	599	378	274	884	315	366	315	444	539	296	339	421
ENSG00000090776	79	75	76	64	90	117	28	83	89	56	142	138
ENSG00000090857	194	135	85	316	176	113	141	214	220	185	251	186
ENSG00000090861	385	224	157	418	234	179	132	184	216	195	280	205
ENSG00000090863	2111	1254	999	1522	1457	1292	1221	1457	1713	1332	2242	1775
ENSG00000090889	275	186	137	432	139	154	93	155	176	197	202	180
ENSG00000090905	646	491	499	667	469	476	345	542	614	368	600	658
ENSG00000090924	154	129	111	231	134	139	84	120	122	73	132	116
ENSG00000090932	881	1228	1256	804	1205	1079	1020	1649	1968	665	1404	1127
ENSG00000090971	179	171	148	162	121	126	102	123	125	112	177	160
ENSG00000090975	13	12	2	23	5	10	19	16	14	8	2	11
ENSG00000090989	138	97	106	112	90	144	63	126	144	97	136	142
ENSG00000091009	54	50	57	56	60	54	26	35	50	40	67	50
ENSG00000091039	438	371	394	480	444	354	227	328	401	378	501	447
ENSG00000091073	24	31	29	35	31	31	9	31	17	20	19	27
ENSG00000091127	45	30	18	42	28	21	16	32	22	21	40	30
ENSG00000091129	130	133	79	118	95	100	66	100	139	97	132	135
ENSG00000091136	262	168	132	413	166	178	182	153	200	215	249	220
ENSG00000091140	123	94	101	168	109	83	80	76	105	70	121	99
ENSG00000091157	61	52	30	64	51	54	36	43	50	26	32	49
ENSG00000091164	225	105	140	204	137	156	101	155	182	134	179	154
ENSG00000091317	823	621	550	672	497	527	298	487	546	416	678	590
ENSG00000091409	147	61	77	84	67	93	85	93	112	74	103	105
ENSG00000091428	0	3	1	0	1	2	0	2	1	0	0	4
ENSG00000091436	155	100	87	227	95	122	65	88	128	85	128	117
ENSG00000091483	72	40	65	79	93	52	51	40	45	72	78	64
ENSG00000091490	180	108	82	255	153	86	77	49	70	201	182	105
ENSG00000091513	93	9	18	2	6	7	18	13	25	0	14	4
ENSG00000091527	818	546	426	835	327	445	339	592	642	394	473	549
ENSG00000091536	2	0	0	0	0	0	7	0	2	0	0	1
ENSG00000091542	186	151	166	168	189	189	97	97	153	121	242	185
ENSG00000091592	599	590	637	517	876	681	463	562	688	332	989	799
ENSG00000091622	17	15	3	52	23	12	10	14	28	33	26	32
ENSG00000091640	1096	798	501	1431	622	619	599	822	827	727	1269	928
ENSG00000091651	82	62	35	122	55	62	27	36	56	104	91	76
ENSG00000091656	325	244	139	354	189	247	168	325	360	244	331	380
ENSG00000091732	56	54	57	81	59	59	37	24	47	41	71	40
ENSG00000091844	23	11	10	15	9	13	9	15	14	7	17	8
ENSG00000091879	7	2	7	2	12	1	1	4	5	2	3	4
ENSG00000091947	86	45	77	65	74	74	31	53	79	43	80	65
ENSG00000091972	72	68	76	104	81	67	60	55	81	57	96	83
ENSG00000091986	3749	4750	4043	1902	2341	3028	1397	3280	4323	732	3770	3509
ENSG00000092010	287	214	219	269	271	266	165	212	287	196	370	332
ENSG00000092020	375	227	163	369	189	255	156	196	221	184	300	294
ENSG00000092036	33	26	18	30	28	23	8	20	23	13	15	24
ENSG00000092051	53	63	92	26	68	64	20	89	121	23	80	75
ENSG00000092054	0	2	1	2	2	2	1	1	2	0	0	0
ENSG00000092094	129	89	63	145	83	39	56	83	107	109	91	95
ENSG00000092096	203	194	105	173	174	216	73	180	204	107	250	229
ENSG00000092108	201	96	105	210	112	126	74	124	162	119	133	138
ENSG00000092140	145	91	109	133	75	80	46	73	111	50	67	70
ENSG00000092148	507	354	268	448	319	333	255	399	477	280	446	448
ENSG00000092199	2148	1551	1190	1803	1212	1309	927	1087	1275	996	1647	1575
ENSG00000092201	1624	1021	751	2245	1097	1037	742	1074	1147	1035	1261	1244
ENSG00000092203	208	208	165	241	138	155	108	202	214	140	239	192
ENSG00000092208	13	19	30	23	25	20	5	14	13	26	37	18
ENSG00000092295	3	0	0	3	1	1	0	3	2	5	2	0
ENSG00000092330	63	47	61	75	45	52	32	60	60	63	83	69
ENSG00000092421	2188	1363	1370	2532	1488	1413	1054	1702	2507	1141	1868	1331
ENSG00000092439	119	93	55	146	82	89	55	76	95	88	81	89
ENSG00000092445	151	118	115	178	149	146	77	136	166	78	198	145
ENSG00000092470	31	64	59	134	61	101	31	52	39	78	74	87
ENSG00000092529	15	4	4	14	2	1	7	13	10	1	1	5
ENSG00000092531	63	47	40	56	43	59	28	35	51	35	49	47
ENSG00000092621	250	116	103	179	96	112	86	71	125	100	160	141
ENSG00000092758	86	89	111	97	153	109	95	55	77	100	184	136
ENSG00000092820	614	227	221	828	329	233	309	384	387	509	571	520
ENSG00000092841	3030	1982	1963	3958	2557	2144	1278	1480	1803	2297	2905	2429
ENSG00000092847	266	167	171	251	169	178	138	309	337	116	212	232
ENSG00000092853	328	214	232	807	194	235	93	143	144	307	273	283
ENSG00000092871	95	68	48	154	44	39	46	59	56	77	76	69
ENSG00000092929	1	0	4	1	0	3	2	0	2	0	0	0
ENSG00000092931	34	17	15	60	14	37	20	29	47	32	40	31
ENSG00000092964	1495	1052	1144	1200	1216	1046	751	800	1032	1058	1486	1214
ENSG00000092969	102	106	99	150	142	128	62	91	85	104	207	153
ENSG00000092978	209	132	138	214	103	125	115	177	235	143	177	149
ENSG00000093000	160	129	124	205	136	124	57	92	131	113	150	169
ENSG00000093009	34	27	27	76	54	45	9	15	24	54	71	26
ENSG00000093010	91	58	84	86	140	68	54	43	73	93	135	91
ENSG00000093072	1	3	0	0	3	0	3	3	3	0	2	2
ENSG00000093144	182	82	70	229	113	108	70	95	97	142	116	131
ENSG00000093167	126	89	50	156	83	62	71	64	83	103	124	118
ENSG00000093183	136	79	77	169	78	94	64	101	117	89	96	111
ENSG00000093217	6	2	1	10	6	1	1	2	2	2	0	3
ENSG00000094631	416	224	174	388	130	219	185	312	370	136	258	246
ENSG00000094755	1	0	1	1	0	3	0	1	2	0	1	0
ENSG00000094804	98	50	72	227	75	95	34	36	40	114	99	106
ENSG00000094841	13	14	8	12	25	12	10	6	28	10	16	22
ENSG00000094880	66	71	78	98	78	87	40	64	47	56	111	87
ENSG00000094914	108	78	63	104	81	96	46	62	107	73	84	105
ENSG00000094916	2207	1653	1381	3002	1633	1688	1274	1401	1779	1980	2209	2056
ENSG00000094975	552	368	327	480	323	313	212	298	446	323	368	397
ENSG00000095002	121	109	81	219	94	97	34	106	79	85	105	110
ENSG00000095015	544	436	377	246	237	301	200	413	491	116	290	285
ENSG00000095059	159	101	80	125	120	129	58	98	116	97	152	120
ENSG00000095066	58	39	18	50	25	26	33	68	71	32	26	23
ENSG00000095139	166	106	101	112	143	95	68	100	97	109	104	135
ENSG00000095203	16	13	10	20	20	16	17	9	9	15	34	27
ENSG00000095209	27	12	12	17	14	19	5	9	15	17	11	23
ENSG00000095261	30	34	31	43	38	24	18	18	26	33	39	35
ENSG00000095319	123	115	97	151	98	103	61	80	81	152	148	159
ENSG00000095321	104	60	51	108	58	79	57	92	89	49	90	107
ENSG00000095370	1	6	1	2	8	0	2	2	0	0	3	0
ENSG00000095380	87	31	52	124	40	25	25	35	43	57	52	58
ENSG00000095383	3	6	1	7	7	2	5	3	2	5	0	2
ENSG00000095397	14	17	21	6	16	17	8	30	34	15	30	21
ENSG00000095485	27	28	20	27	14	20	13	15	19	28	21	20
ENSG00000095539	10	9	9	9	16	17	11	16	22	8	7	18
ENSG00000095564	243	116	114	228	186	160	123	197	231	187	257	258
ENSG00000095574	26	18	27	14	17	33	16	21	18	30	55	25
ENSG00000095587	8	6	4	7	0	1	3	7	7	12	3	2
ENSG00000095637	270	200	160	320	205	228	116	224	209	166	236	277
ENSG00000095713	4	2	2	0	0	0	2	5	0	0	0	1
ENSG00000095739	11	4	12	21	21	15	15	7	4	10	16	11
ENSG00000095752	12	15	3	37	10	4	11	3	3	48	15	17
ENSG00000095787	823	531	511	911	510	497	387	598	782	581	728	666
ENSG00000095794	64	42	30	51	55	30	40	44	65	32	45	35
ENSG00000095906	188	151	148	237	195	154	107	118	155	111	164	191
ENSG00000095951	70	72	76	46	47	49	48	59	48	66	72	94
ENSG00000096060	54	36	31	111	41	46	17	30	34	52	76	47
ENSG00000096063	166	105	122	153	123	147	54	109	124	121	153	144
ENSG00000096070	33	27	29	22	18	22	13	16	27	29	21	29
ENSG00000096080	103	57	87	123	76	104	51	80	71	59	85	88
ENSG00000096092	30	45	36	32	64	57	36	40	37	27	55	44
ENSG00000096093	85	57	54	106	70	47	42	51	53	32	65	33
ENSG00000096384	9276	5223	4503	11275	4066	4785	4301	5427	6255	5058	6154	5651
ENSG00000096395	2	7	8	2	11	8	2	6	4	10	3	5
ENSG00000096401	368	288	256	503	267	266	198	262	352	347	344	274
ENSG00000096433	5	6	9	8	5	11	5	11	10	3	3	5
ENSG00000096654	16	23	17	30	33	37	13	34	37	27	45	30
ENSG00000096717	46	47	35	58	56	40	39	34	45	45	64	61
ENSG00000096746	683	495	568	772	405	373	342	368	525	478	444	398
ENSG00000096872	81	46	38	102	36	36	48	66	72	37	67	54
ENSG00000096968	42	32	22	30	35	19	16	25	24	16	23	26
ENSG00000097007	185	143	184	200	266	274	92	164	163	151	296	243
ENSG00000097021	95	76	63	135	85	55	30	35	45	119	112	95
ENSG00000097033	334	308	255	335	256	219	229	286	332	255	324	262
ENSG00000097046	27	30	25	35	57	36	12	31	24	36	33	36
ENSG00000097096	4	5	10	13	3	7	7	5	1	0	5	3
ENSG00000099139	28	7	25	40	22	29	3	15	14	16	47	32
ENSG00000099194	4770	1586	2021	2306	1548	1485	1792	1365	2139	1616	2287	2010
ENSG00000099203	107	71	75	140	93	86	58	99	125	63	125	129
ENSG00000099204	547	428	350	397	406	408	284	524	538	268	555	574
ENSG00000099219	21	17	12	17	15	11	4	14	10	6	19	11
ENSG00000099246	197	209	233	233	292	226	121	157	190	169	260	255
ENSG00000099250	130	59	49	146	91	58	40	61	52	95	65	75
ENSG00000099256	32	28	25	59	34	30	38	25	20	23	52	40
ENSG00000099260	42	29	13	37	16	40	25	21	29	10	20	15
ENSG00000099282	17	5	5	12	15	12	5	10	7	10	14	12
ENSG00000099284	153	94	98	103	117	137	88	80	85	89	122	115
ENSG00000099290	137	99	62	94	85	77	49	85	88	69	74	80
ENSG00000099308	12	19	20	20	21	27	8	13	23	13	20	21
ENSG00000099326	90	49	35	78	28	38	56	65	78	29	61	39
ENSG00000099330	25	6	11	15	9	13	16	12	10	7	10	8
ENSG00000099331	479	328	250	414	255	248	174	319	378	220	343	345
ENSG00000099338	3	0	0	2	0	6	1	2	1	1	0	3
ENSG00000099341	631	448	335	776	462	433	283	445	499	416	648	544
ENSG00000099364	51	39	67	46	50	66	30	47	70	31	57	52
ENSG00000099365	5	9	5	7	6	4	0	11	8	7	10	10
ENSG00000099377	4	4	0	21	16	13	5	7	11	8	19	4
ENSG00000099381	102	50	73	111	69	52	42	87	77	65	102	115
ENSG00000099385	79	42	62	52	57	43	16	32	49	26	56	77
ENSG00000099622	1043	676	547	1087	1040	811	836	909	931	821	1457	1236
ENSG00000099624	76	102	99	99	83	96	55	61	74	74	162	137
ENSG00000099625	179	177	124	148	122	119	133	134	160	102	188	178
ENSG00000099783	2347	1286	1105	2691	951	1152	1265	1218	1563	1399	1296	1348
ENSG00000099785	55	28	44	32	47	35	34	32	47	25	52	35
ENSG00000099795	112	126	221	95	155	130	67	91	105	103	191	180
ENSG00000099797	40	32	68	35	100	42	29	16	23	59	53	44
ENSG00000099800	754	641	521	990	553	597	415	578	600	462	768	765
ENSG00000099804	298	233	221	268	225	244	151	249	221	148	260	253
ENSG00000099810	77	61	63	85	89	77	51	94	89	93	88	109
ENSG00000099814	119	168	123	130	93	87	74	136	163	64	119	139
ENSG00000099817	1547	1202	768	1678	1096	1228	545	1068	1066	675	1250	1410
ENSG00000099821	50	49	42	56	37	36	29	34	51	31	45	38
ENSG00000099822	23	22	13	18	9	16	9	31	37	1	19	27
ENSG00000099840	39	14	16	12	5	22	16	22	38	9	17	19
ENSG00000099849	13	4	1	11	10	3	1	5	10	9	12	10
ENSG00000099860	16	1	2	10	8	3	2	2	0	8	4	8
ENSG00000099864	318	319	257	431	249	283	194	304	352	167	390	363
ENSG00000099866	3	4	0	0	1	2	0	5	3	1	1	0
ENSG00000099875	148	88	66	125	58	66	68	101	86	88	93	81
ENSG00000099889	72	47	59	81	93	70	65	48	84	55	107	58
ENSG00000099899	29	28	17	41	29	9	19	19	24	20	33	36
ENSG00000099901	785	688	521	1167	694	636	295	485	447	546	854	705
ENSG00000099904	23	36	25	15	59	37	26	14	34	42	50	24
ENSG00000099910	109	102	69	161	68	85	50	74	73	78	115	100
ENSG00000099917	236	186	152	209	153	192	105	159	202	108	175	186
ENSG00000099940	188	123	125	261	139	149	107	172	149	113	144	146
ENSG00000099942	143	83	105	123	117	141	56	111	120	100	114	134
ENSG00000099949	91	70	58	101	55	56	48	72	89	38	70	54
ENSG00000099953	9	18	6	11	21	11	6	7	5	5	32	11
ENSG00000099954	202	155	123	170	136	191	139	195	294	123	278	246
ENSG00000099956	316	256	139	287	171	194	171	245	222	190	300	286
ENSG00000099957	15	6	4	22	6	4	13	8	1	1	4	4
ENSG00000099958	80	19	9	51	19	31	8	12	9	33	26	20
ENSG00000099968	135	109	110	126	100	133	92	67	90	119	138	113
ENSG00000099977	278	223	214	310	310	212	171	153	148	193	347	249
ENSG00000099991	440	264	272	343	174	206	159	261	314	135	273	237
ENSG00000099992	11	14	4	12	9	13	8	12	15	7	17	18
ENSG00000099995	306	230	160	324	214	200	163	231	219	243	253	232
ENSG00000099999	33	17	11	21	13	11	18	25	24	13	20	21
ENSG00000100003	50	19	13	58	18	24	19	34	22	47	43	42
ENSG00000100014	133	78	62	132	114	82	53	88	104	110	99	112
ENSG00000100023	90	61	55	82	72	71	33	74	57	51	77	47
ENSG00000100027	60	38	41	67	42	54	20	41	56	44	75	50
ENSG00000100028	230	193	166	286	226	191	143	164	159	198	280	230
ENSG00000100029	191	134	92	188	87	107	74	159	93	96	103	117
ENSG00000100030	311	361	376	296	324	246	165	241	307	170	388	352
ENSG00000100031	0	0	1	8	2	2	0	3	3	10	2	7
ENSG00000100034	143	172	160	148	183	103	73	94	113	79	120	104
ENSG00000100036	23	10	17	39	8	9	15	14	13	22	12	11
ENSG00000100038	3	4	6	0	1	3	0	0	1	2	2	0
ENSG00000100056	38	48	32	47	41	41	18	42	42	25	52	50
ENSG00000100060	11	4	10	34	32	36	16	29	16	35	44	42
ENSG00000100065	11	4	4	46	9	9	13	2	2	61	36	29
ENSG00000100068	1	0	0	4	0	0	2	3	1	0	0	0
ENSG00000100075	376	167	260	241	191	197	87	177	163	123	206	217
ENSG00000100077	26	17	17	32	17	18	8	13	16	21	20	17
ENSG00000100078	64	8	1	4	0	0	3	5	6	5	14	7
ENSG00000100079	2	2	2	1	0	1	3	7	0	1	1	9
ENSG00000100083	298	187	123	299	165	155	176	256	257	147	192	211
ENSG00000100084	17	8	2	8	2	11	9	9	7	14	9	23
ENSG00000100092	13	5	15	15	9	6	9	9	8	6	13	8
ENSG00000100095	477	488	569	434	709	505	387	459	547	394	887	652
ENSG00000100097	2465	992	952	2134	1458	1140	872	936	1010	1085	1634	1416
ENSG00000100099	92	79	61	93	80	83	66	97	107	56	79	72
ENSG00000100100	17	23	25	14	35	18	14	20	22	22	28	44
ENSG00000100104	51	47	57	56	50	33	23	36	40	31	63	41
ENSG00000100105	330	234	182	335	231	211	148	189	267	145	278	314
ENSG00000100106	234	144	236	345	265	145	122	111	159	351	283	159
ENSG00000100109	103	72	49	120	84	76	78	69	70	67	96	66
ENSG00000100116	91	50	36	76	58	49	53	46	54	37	79	55
ENSG00000100124	75	50	37	78	40	42	44	58	55	49	62	66
ENSG00000100129	619	472	437	726	504	472	410	476	624	430	812	591
ENSG00000100138	449	377	302	564	359	336	237	296	315	269	462	369
ENSG00000100139	181	105	83	173	124	98	109	122	132	125	142	81
ENSG00000100142	471	399	395	471	428	403	224	273	337	283	479	445
ENSG00000100147	11	6	6	8	7	13	6	5	15	16	10	15
ENSG00000100150	20	5	2	10	13	10	6	17	16	27	11	5
ENSG00000100151	9	10	7	20	7	16	7	25	18	14	32	10
ENSG00000100154	71	72	59	69	90	67	44	50	77	54	62	82
ENSG00000100162	103	70	63	153	62	71	22	33	34	70	61	70
ENSG00000100167	164	180	135	209	153	162	95	163	187	109	221	207
ENSG00000100196	9	3	8	9	7	5	3	4	1	10	13	18
ENSG00000100197	1	1	0	0	5	0	2	0	2	0	0	0
ENSG00000100201	2603	1937	1645	1889	1459	1808	1308	1930	2330	1291	1968	1742
ENSG00000100207	98	63	57	83	66	68	57	61	67	64	91	104
ENSG00000100209	18	8	17	18	16	15	8	13	13	13	20	13
ENSG00000100211	175	126	84	217	126	161	100	117	121	93	152	113
ENSG00000100216	262	237	255	292	362	229	206	173	181	259	392	264
ENSG00000100218	3	0	1	2	6	3	2	7	7	3	3	12
ENSG00000100219	151	60	68	167	84	79	51	28	71	82	108	102
ENSG00000100220	167	146	172	221	203	155	125	102	140	220	176	169
ENSG00000100221	104	66	59	79	55	66	39	60	77	79	60	63
ENSG00000100225	225	177	165	273	222	181	146	177	195	154	280	226
ENSG00000100226	179	106	112	164	130	132	83	120	142	123	182	182
ENSG00000100227	272	283	213	452	224	223	151	218	246	192	299	279
ENSG00000100228	55	32	23	50	53	31	23	34	39	21	43	35
ENSG00000100234	496	320	305	895	661	543	498	391	387	260	602	510
ENSG00000100239	106	72	90	89	92	101	74	78	98	75	113	93
ENSG00000100241	654	483	340	611	376	471	286	491	465	257	521	556
ENSG00000100242	170	130	190	174	157	154	171	126	130	197	251	215
ENSG00000100243	389	330	298	428	452	355	232	327	335	311	554	479
ENSG00000100246	99	80	60	62	71	63	62	63	69	47	87	68
ENSG00000100258	136	103	57	205	84	97	50	120	125	92	144	134
ENSG00000100263	37	25	30	45	38	39	27	42	22	39	45	43
ENSG00000100266	209	86	95	181	77	96	96	115	132	80	119	102
ENSG00000100271	41	25	25	40	21	44	32	23	35	17	28	25
ENSG00000100280	450	306	233	563	342	259	281	353	361	234	432	397
ENSG00000100281	384	329	229	450	288	257	144	230	270	304	411	356
ENSG00000100284	67	42	52	74	51	46	37	51	52	30	62	65
ENSG00000100285	5	9	4	10	16	17	8	24	14	7	17	8
ENSG00000100288	62	45	38	65	57	52	42	83	52	33	61	54
ENSG00000100292	25	6	10	8	3	11	0	12	17	14	10	12
ENSG00000100294	43	37	22	40	15	38	21	30	28	40	36	44
ENSG00000100296	98	63	47	103	51	93	52	93	82	66	103	68
ENSG00000100297	143	176	136	261	153	175	48	74	85	131	152	187
ENSG00000100299	55	36	23	42	31	46	10	37	28	24	23	45
ENSG00000100300	27	24	22	52	39	48	25	33	26	29	52	40
ENSG00000100302	1	1	5	9	4	10	4	1	6	3	2	4
ENSG00000100304	57	67	65	103	103	53	31	35	47	77	64	69
ENSG00000100307	13	2	5	3	8	3	16	13	10	7	6	4
ENSG00000100311	5	8	6	11	9	5	1	0	5	12	7	1
ENSG00000100314	5	10	8	8	46	22	1	21	14	21	53	50
ENSG00000100316	1128	933	1022	1490	1339	884	891	873	1076	1118	1726	1139
ENSG00000100319	69	68	51	65	60	74	47	70	56	31	68	71
ENSG00000100320	396	250	248	346	249	279	142	245	323	250	319	331
ENSG00000100321	32	30	24	30	15	12	19	31	34	10	46	23
ENSG00000100324	84	63	66	78	46	62	52	57	74	61	73	84
ENSG00000100325	87	75	73	86	115	58	39	54	68	85	94	81
ENSG00000100330	83	67	52	71	81	59	65	99	103	69	99	104
ENSG00000100335	265	181	173	360	177	216	169	216	265	195	283	200
ENSG00000100336	5	1	4	6	4	2	8	5	8	1	5	9
ENSG00000100344	811	131	147	442	77	127	178	184	286	171	261	227
ENSG00000100345	545	341	291	848	309	274	166	238	197	520	449	344
ENSG00000100347	139	96	91	160	131	83	82	109	107	111	129	127
ENSG00000100348	445	332	295	519	371	301	218	355	361	183	383	438
ENSG00000100350	256	262	186	380	184	177	131	227	286	135	213	236
ENSG00000100353	666	442	361	741	410	351	385	433	438	411	640	491
ENSG00000100354	1163	806	633	980	634	892	601	1023	1257	699	984	949
ENSG00000100359	176	83	73	116	65	84	52	91	118	80	88	94
ENSG00000100360	114	84	54	106	73	75	80	83	109	46	98	82
ENSG00000100364	103	63	69	96	47	60	52	80	63	60	99	94
ENSG00000100372	35	22	28	38	32	19	17	22	19	35	41	35
ENSG00000100376	40	31	23	45	16	17	25	36	37	28	36	32
ENSG00000100379	261	174	112	271	133	185	81	146	138	121	200	200
ENSG00000100380	1106	683	561	841	620	682	444	690	759	455	794	773
ENSG00000100387	352	232	230	312	338	281	166	201	305	259	376	286
ENSG00000100393	511	318	296	573	235	313	259	434	565	348	436	388
ENSG00000100395	183	124	73	173	116	109	65	109	122	70	165	119
ENSG00000100399	8	7	4	9	4	11	14	5	11	2	19	6
ENSG00000100401	535	426	320	720	237	333	224	306	307	225	390	350
ENSG00000100403	132	114	123	133	165	99	72	63	89	89	150	132
ENSG00000100410	96	94	112	110	106	141	36	64	70	78	117	116
ENSG00000100412	186	200	178	217	303	192	146	125	186	162	278	286
ENSG00000100413	82	53	68	138	107	75	56	42	62	91	104	101
ENSG00000100416	42	41	42	86	47	43	36	61	57	68	75	60
ENSG00000100417	166	89	76	174	63	92	73	126	117	76	123	117
ENSG00000100418	118	64	84	105	83	98	24	87	67	52	86	51
ENSG00000100422	149	73	62	160	100	77	66	76	132	80	74	100
ENSG00000100425	118	63	45	76	52	63	48	74	103	49	86	89
ENSG00000100426	154	113	88	170	109	95	61	120	135	68	127	119
ENSG00000100427	819	833	900	394	753	777	405	495	683	244	1034	942
ENSG00000100429	78	43	52	44	20	34	30	75	84	27	27	36
ENSG00000100433	20	21	11	22	16	22	12	18	23	22	15	17
ENSG00000100439	88	85	98	74	113	117	56	62	89	48	145	122
ENSG00000100441	90	63	48	103	75	44	50	63	67	83	69	69
ENSG00000100442	523	370	324	608	338	334	244	258	306	287	404	387
ENSG00000100445	112	104	92	104	151	108	77	90	83	62	140	133
ENSG00000100461	242	156	133	190	123	138	82	134	167	126	151	188
ENSG00000100462	141	101	124	182	155	119	85	100	113	117	162	143
ENSG00000100473	16	20	20	18	34	12	9	3	14	22	14	13
ENSG00000100478	49	63	32	61	24	47	28	45	60	24	41	40
ENSG00000100479	11	23	8	12	10	13	7	5	6	8	7	9
ENSG00000100483	13	18	26	19	6	14	6	16	11	10	20	19
ENSG00000100485	184	137	108	163	125	153	93	127	129	98	175	179
ENSG00000100490	8	9	2	6	1	3	1	5	5	0	7	8
ENSG00000100503	1352	765	550	1498	879	935	681	1243	1480	1044	1557	1729
ENSG00000100504	12	10	11	23	14	30	3	15	17	16	11	18
ENSG00000100505	341	357	372	257	315	220	206	265	322	289	461	400
ENSG00000100519	185	131	99	242	144	114	93	123	139	143	168	174
ENSG00000100522	73	51	49	77	61	45	31	49	42	57	50	60
ENSG00000100523	93	84	40	63	78	92	30	96	75	58	72	82
ENSG00000100526	63	46	42	82	36	36	60	14	39	64	40	54
ENSG00000100528	102	95	76	118	82	112	55	60	66	64	126	89
ENSG00000100532	28	20	22	20	19	22	10	20	9	19	29	16
ENSG00000100554	192	130	125	235	147	137	117	138	152	126	224	214
ENSG00000100564	18	11	26	11	25	11	9	17	13	11	18	19
ENSG00000100567	118	76	139	137	152	123	89	84	105	124	175	125
ENSG00000100568	247	183	159	314	165	197	169	163	208	152	225	215
ENSG00000100575	41	47	38	43	65	37	13	29	41	37	36	50
ENSG00000100577	221	84	45	192	67	86	98	155	126	81	103	126
ENSG00000100578	137	99	119	176	110	118	67	150	155	126	162	175
ENSG00000100580	177	113	99	169	101	85	85	119	142	92	109	142
ENSG00000100583	38	21	8	28	16	21	28	24	19	13	14	16
ENSG00000100591	447	336	291	494	176	333	157	252	264	213	298	266
ENSG00000100592	785	499	434	1069	442	557	396	605	685	426	689	642
ENSG00000100596	222	126	92	249	105	91	103	137	145	106	124	119
ENSG00000100599	4	1	0	4	0	0	1	3	3	0	4	1
ENSG00000100600	17	17	21	15	34	34	9	7	9	31	49	17
ENSG00000100601	6	2	5	2	8	8	3	5	8	5	15	6
ENSG00000100603	391	259	193	415	258	246	226	235	303	287	278	311
ENSG00000100604	9	5	1	5	3	10	1	6	14	5	10	0
ENSG00000100605	147	87	99	233	134	117	100	87	96	106	115	140
ENSG00000100612	82	78	44	110	42	52	78	69	59	73	78	81
ENSG00000100614	75	70	56	69	51	65	50	59	64	64	88	49
ENSG00000100625	8	13	8	8	5	4	0	8	1	9	6	13
ENSG00000100626	51	36	26	114	30	60	20	37	44	51	61	69
ENSG00000100629	52	36	20	67	32	33	20	22	33	25	29	19
ENSG00000100632	936	767	679	1085	691	755	489	696	664	658	945	954
ENSG00000100644	581	396	415	335	282	321	229	309	409	265	389	427
ENSG00000100647	43	36	31	55	55	57	49	38	44	49	73	56
ENSG00000100650	694	413	307	555	342	330	417	547	557	342	559	557
ENSG00000100664	346	159	160	398	195	149	164	146	237	293	289	278
ENSG00000100697	341	220	180	358	238	262	188	271	271	195	264	282
ENSG00000100711	120	140	127	181	116	128	121	102	133	75	161	131
ENSG00000100714	119	115	104	215	132	98	90	92	86	112	146	137
ENSG00000100722	190	149	158	240	139	171	102	176	171	154	183	190
ENSG00000100726	50	32	30	38	29	48	19	43	26	24	28	76
ENSG00000100731	253	206	153	231	167	180	108	210	300	145	225	216
ENSG00000100744	37	25	54	42	22	38	13	33	35	29	36	31
ENSG00000100749	223	146	158	339	182	145	79	115	129	182	235	219
ENSG00000100764	1656	750	382	1506	478	672	428	875	911	471	707	913
ENSG00000100767	0	2	0	2	8	7	4	1	2	3	10	9
ENSG00000100784	21	7	4	16	14	13	15	15	7	21	21	19
ENSG00000100796	269	166	122	289	159	194	150	181	195	166	238	209
ENSG00000100802	31	20	10	45	12	19	12	24	29	14	26	12
ENSG00000100804	709	571	602	686	584	516	358	461	515	498	791	660
ENSG00000100811	625	481	386	675	446	433	316	436	561	428	614	517
ENSG00000100813	1100	752	445	926	551	747	553	772	723	573	761	769
ENSG00000100814	101	75	58	109	103	90	51	88	80	90	123	105
ENSG00000100815	416	252	236	432	207	277	205	301	374	219	268	275
ENSG00000100823	674	477	346	604	617	445	343	381	522	471	625	596
ENSG00000100836	333	205	198	327	219	209	257	256	271	291	327	315
ENSG00000100842	0	1	5	0	1	1	1	1	3	1	2	0
ENSG00000100852	425	344	312	411	288	340	196	295	388	209	413	421
ENSG00000100865	68	73	39	93	43	60	40	55	61	45	84	60
ENSG00000100867	1	0	6	3	0	2	17	1	9	1	3	2
ENSG00000100883	97	72	68	96	94	89	59	78	98	69	100	117
ENSG00000100888	613	457	300	558	410	411	312	528	563	320	583	484
ENSG00000100889	13	1	1	4	8	0	7	11	3	17	1	0
ENSG00000100890	36	21	14	39	17	25	23	32	25	20	24	33
ENSG00000100897	435	250	187	343	295	223	180	216	306	201	297	268
ENSG00000100902	16	13	10	12	12	13	4	8	16	14	16	14
ENSG00000100906	59	61	85	106	67	57	51	45	45	125	121	94
ENSG00000100908	32	33	28	65	30	47	27	10	34	37	47	58
ENSG00000100911	184	115	99	236	103	108	100	98	145	79	136	131
ENSG00000100916	78	35	31	71	69	55	28	56	79	55	115	91
ENSG00000100918	524	235	231	446	218	267	240	228	295	176	277	227
ENSG00000100926	81	48	31	100	29	53	19	60	56	55	46	55
ENSG00000100934	43	38	31	40	55	42	20	47	54	34	41	44
ENSG00000100938	49	46	46	77	41	41	41	31	45	31	66	46
ENSG00000100941	1782	1028	930	2301	763	955	935	1060	1406	942	1053	1101
ENSG00000100949	74	49	25	45	42	50	22	31	57	43	59	51
ENSG00000100968	84	83	57	112	67	73	83	158	162	73	129	128
ENSG00000100979	307	268	200	359	244	255	150	335	352	153	437	358
ENSG00000100982	27	32	13	22	30	30	21	17	34	32	44	44
ENSG00000100983	135	96	82	163	98	131	58	127	109	81	129	118
ENSG00000100991	137	96	106	89	160	126	79	70	91	105	170	150
ENSG00000100994	160	129	77	306	151	130	96	166	146	208	191	169
ENSG00000100997	125	115	79	134	115	125	55	85	90	72	169	156
ENSG00000101003	74	44	39	111	65	45	19	29	40	61	68	71
ENSG00000101004	100	53	40	56	38	46	36	56	71	49	84	71
ENSG00000101019	57	27	36	43	42	26	35	40	51	36	48	33
ENSG00000101040	674	412	402	451	369	409	288	437	596	272	425	395
ENSG00000101052	34	28	60	25	52	39	19	21	24	27	63	36
ENSG00000101057	243	187	125	488	192	176	96	108	82	212	288	245
ENSG00000101079	95	84	82	113	111	105	77	79	94	75	112	110
ENSG00000101084	73	59	62	82	57	55	30	40	33	60	84	87
ENSG00000101096	38	11	14	31	6	11	22	14	17	53	31	8
ENSG00000101098	25	20	45	5	12	28	8	57	44	0	20	15
ENSG00000101104	96	68	70	127	55	51	48	72	87	70	56	63
ENSG00000101109	160	128	95	231	154	122	117	140	164	116	189	124
ENSG00000101115	17	16	16	9	21	15	2	25	25	2	31	17
ENSG00000101126	299	208	199	241	186	214	106	254	246	177	297	262
ENSG00000101132	187	118	131	220	146	151	81	121	165	90	167	159
ENSG00000101134	31	61	56	24	44	62	7	25	32	8	66	71
ENSG00000101138	45	52	53	63	50	40	33	49	40	39	75	62
ENSG00000101144	482	269	291	448	232	243	212	325	382	215	290	257
ENSG00000101146	234	179	134	310	181	144	121	140	179	179	239	205
ENSG00000101150	330	230	159	357	238	204	176	261	238	187	255	274
ENSG00000101152	435	318	179	606	276	285	246	314	357	298	491	408
ENSG00000101158	197	158	152	183	213	170	139	143	180	173	204	173
ENSG00000101161	818	478	428	812	334	422	410	625	659	340	468	517
ENSG00000101166	33	30	26	32	29	24	25	29	41	14	24	21
ENSG00000101180	0	0	1	1	4	3	1	2	0	0	0	0
ENSG00000101181	111	55	40	82	65	36	55	75	77	69	63	65
ENSG00000101182	1152	688	637	1431	795	705	629	702	766	828	1020	832
ENSG00000101187	109	40	23	94	76	68	68	56	50	74	65	71
ENSG00000101188	77	63	57	64	68	53	54	68	77	43	91	74
ENSG00000101189	87	40	70	86	52	47	39	50	55	58	61	60
ENSG00000101190	27	31	17	53	26	34	14	19	26	20	30	29
ENSG00000101191	168	130	105	134	117	109	77	113	153	97	203	141
ENSG00000101193	265	199	156	274	209	177	154	170	189	224	293	254
ENSG00000101198	231	181	219	157	169	218	132	247	280	95	236	245
ENSG00000101199	158	102	92	96	102	89	74	110	122	77	119	119
ENSG00000101203	102	206	171	78	112	131	40	158	186	28	195	152
ENSG00000101210	44	90	99	60	71	74	28	64	71	10	102	111
ENSG00000101216	59	76	63	76	73	55	44	46	73	54	90	99
ENSG00000101220	105	76	57	126	90	83	53	60	55	64	80	74
ENSG00000101222	1	1	3	1	1	5	9	2	2	4	6	0
ENSG00000101224	417	297	229	801	409	476	324	379	389	483	515	473
ENSG00000101236	214	156	135	225	180	196	85	145	175	162	222	242
ENSG00000101246	44	32	57	44	37	47	30	44	42	32	56	39
ENSG00000101247	18	26	19	46	31	21	16	28	21	22	42	38
ENSG00000101255	16	3	2	3	4	3	11	9	9	19	20	5
ENSG00000101265	416	407	421	384	369	415	195	359	411	209	494	475
ENSG00000101266	482	396	353	436	428	448	299	320	416	320	428	429
ENSG00000101290	100	74	69	101	97	70	60	75	116	82	165	126
ENSG00000101294	358	203	140	356	147	165	143	225	222	163	212	229
ENSG00000101298	22	27	16	31	12	19	6	27	19	12	30	38
ENSG00000101310	111	80	81	153	82	77	56	96	74	76	106	80
[truncated: 13,069 more rows]
